# Supplementary figures and images for: Mutations and Copy Number Alterations in IDH Wild-Type Glioblastomas Are Shaped by Different Oncogenic Mechanisms
Source: MDPI journal article supplement (doi:10.3390/biomedicines8120574), 2020-12-07

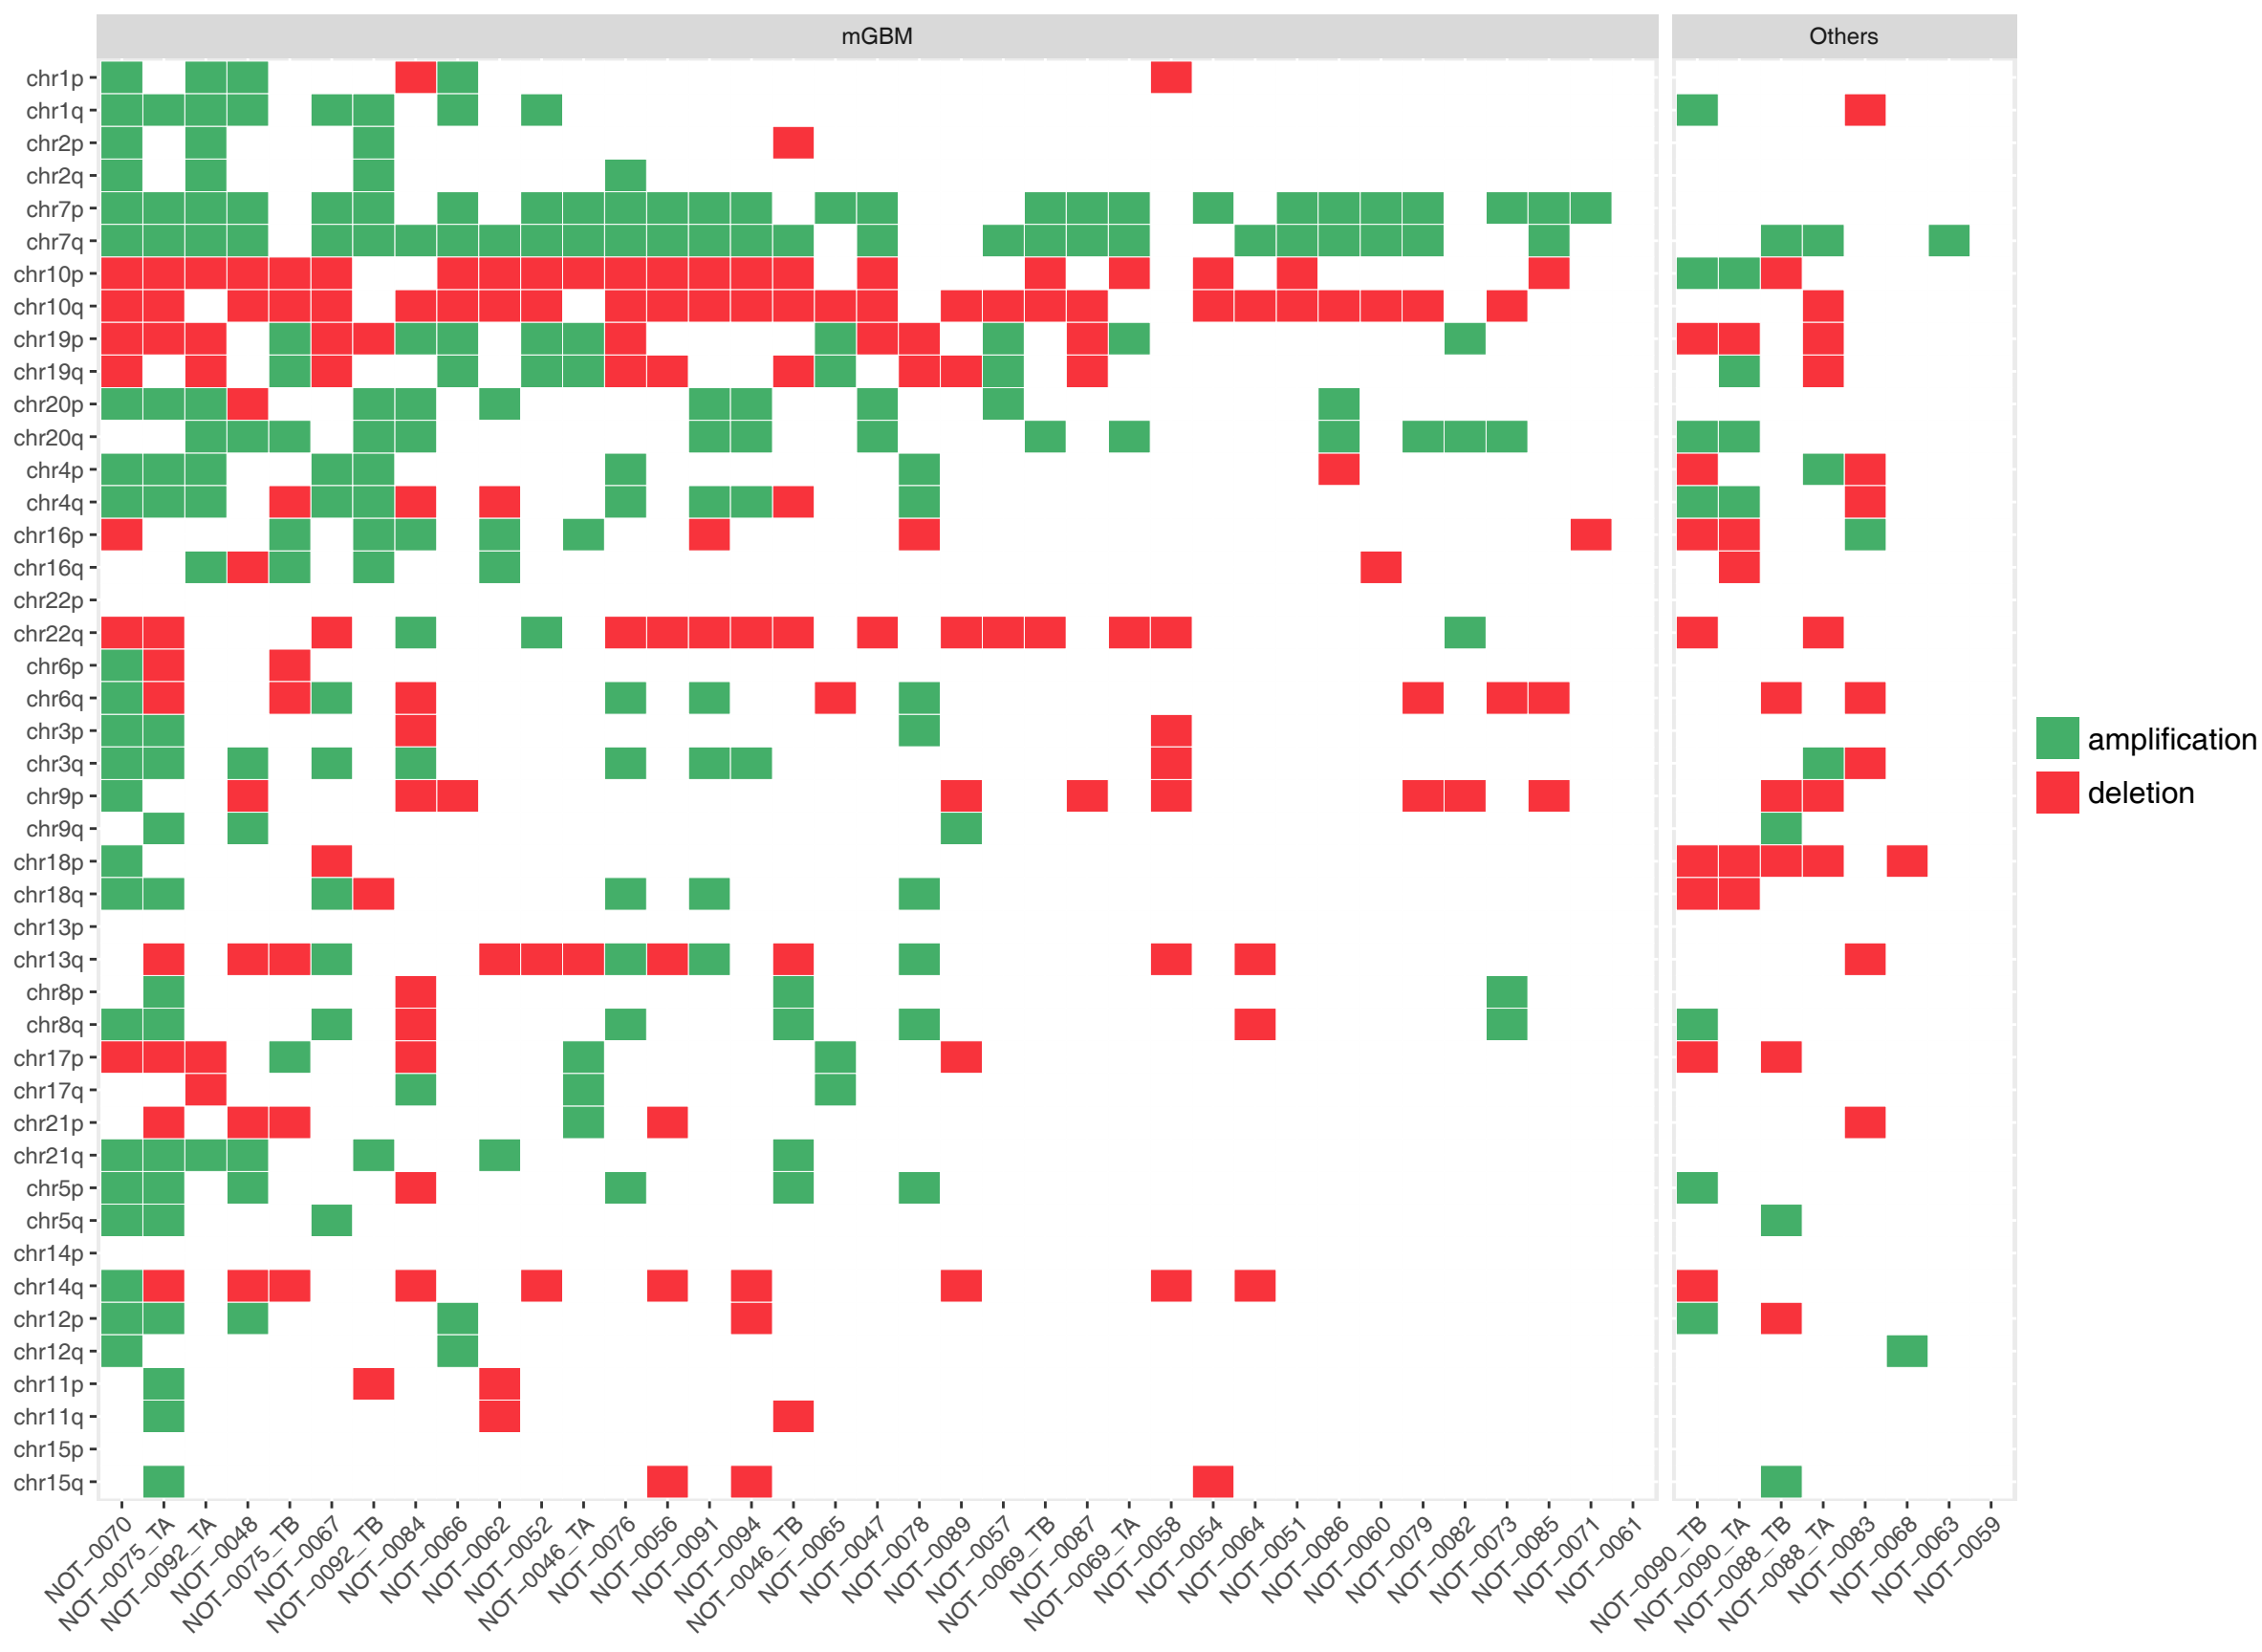

Supplement: s1 [file s1]

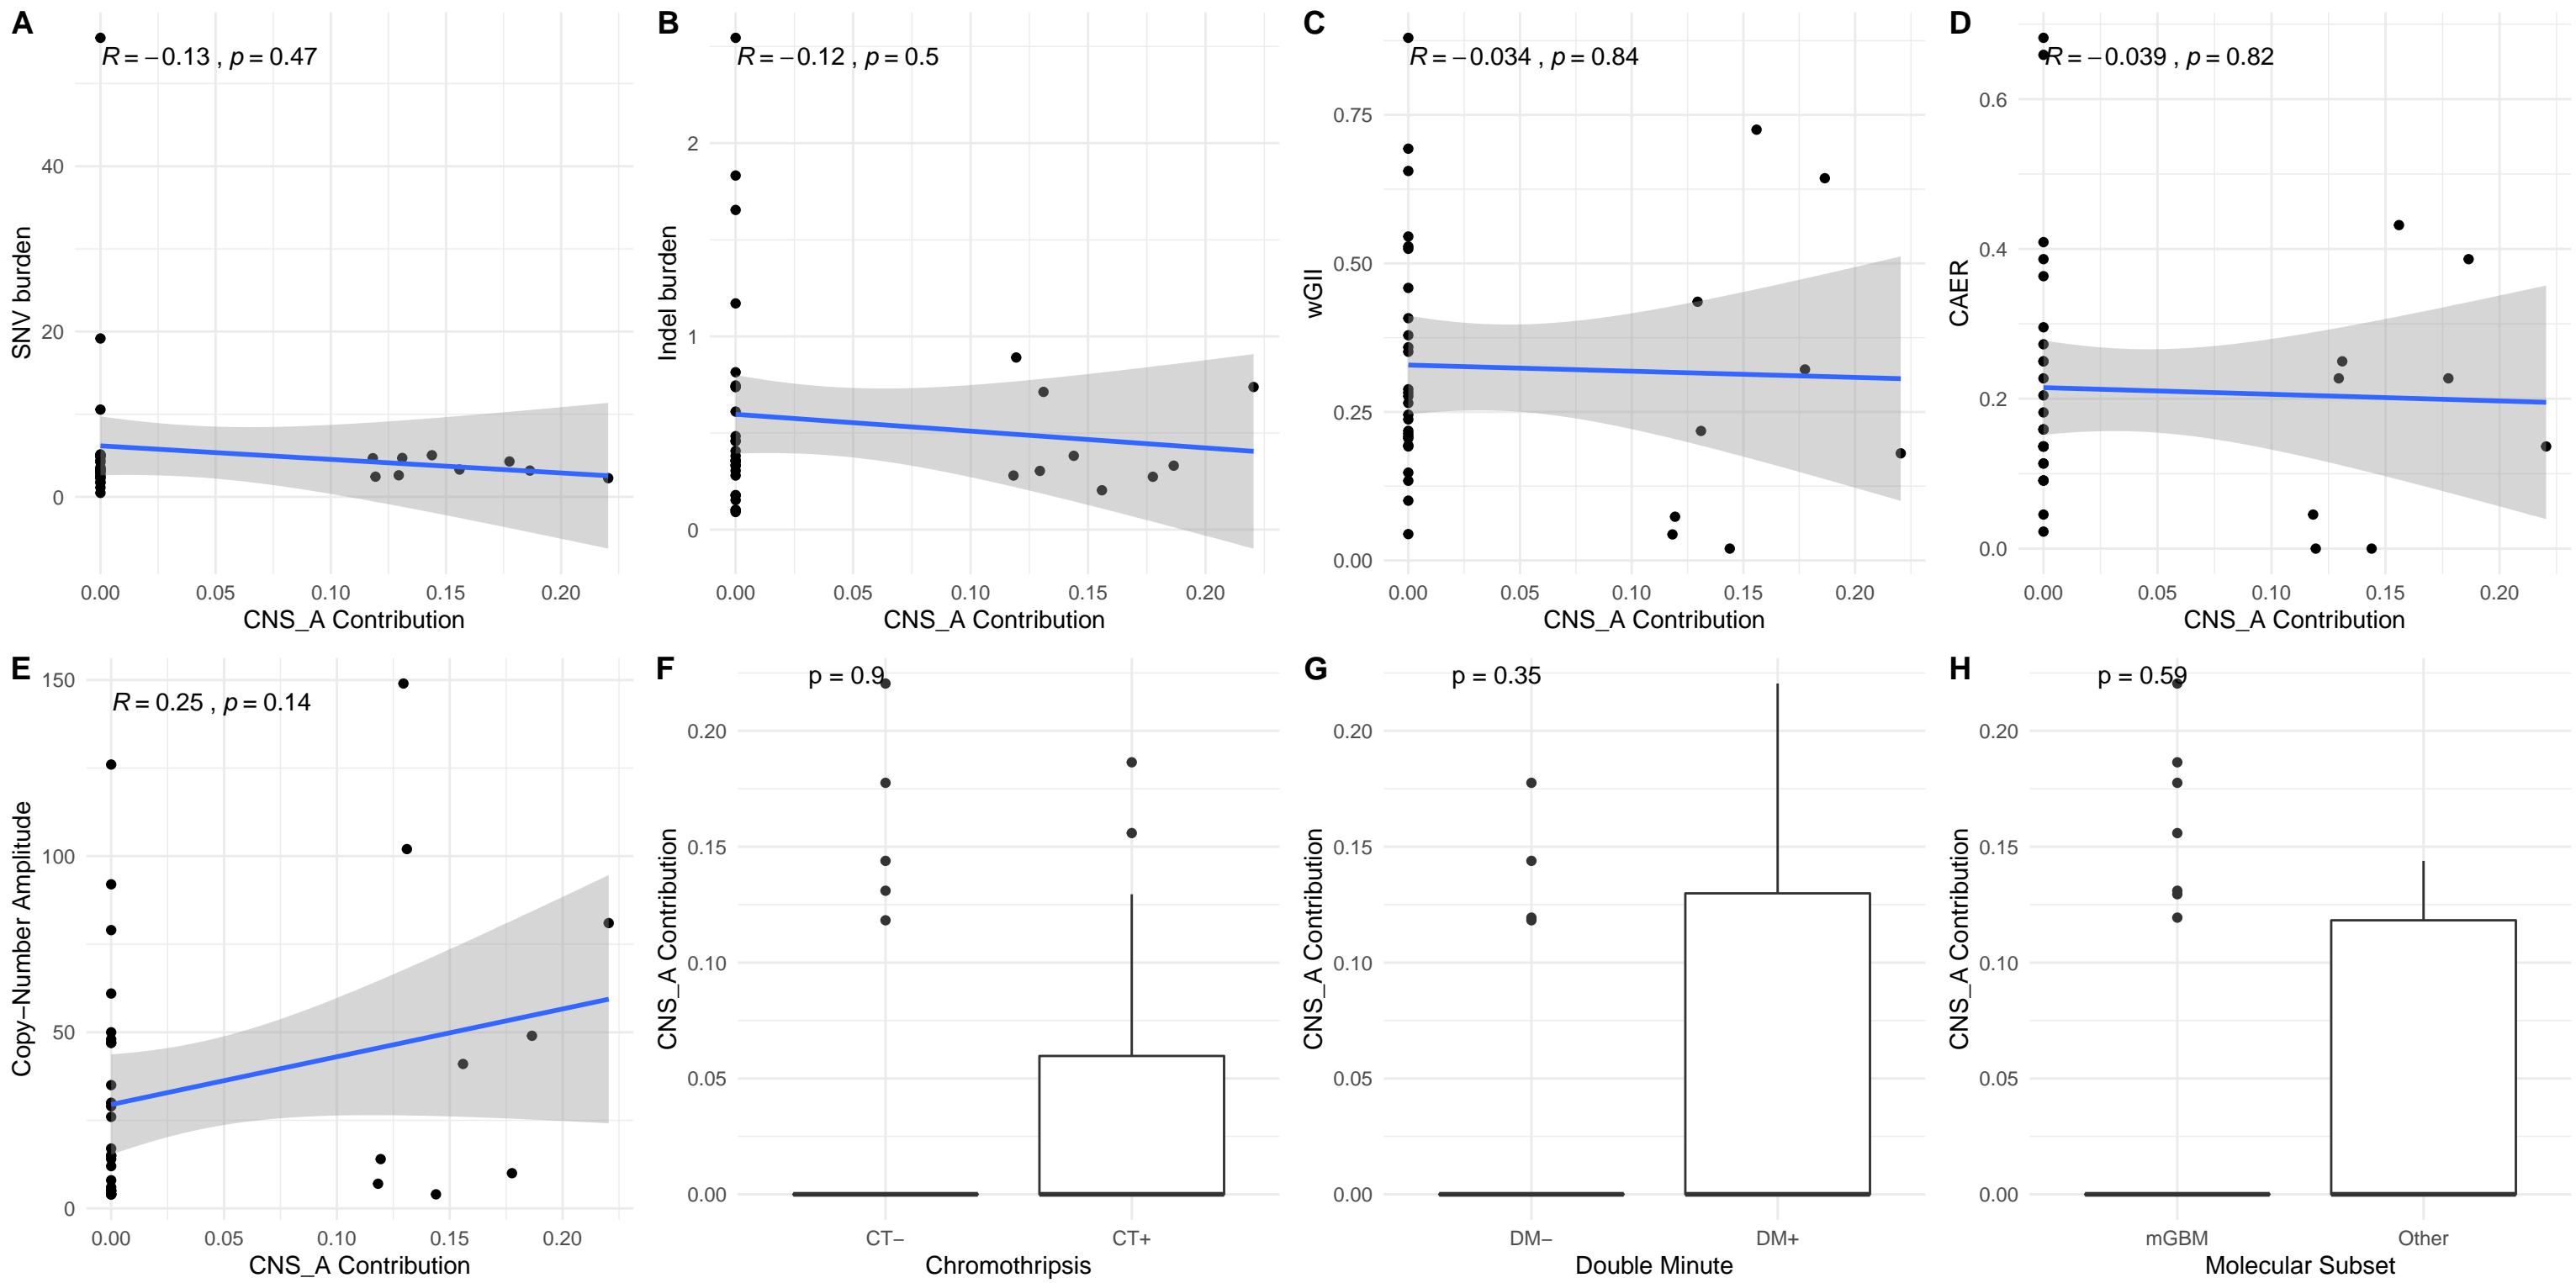

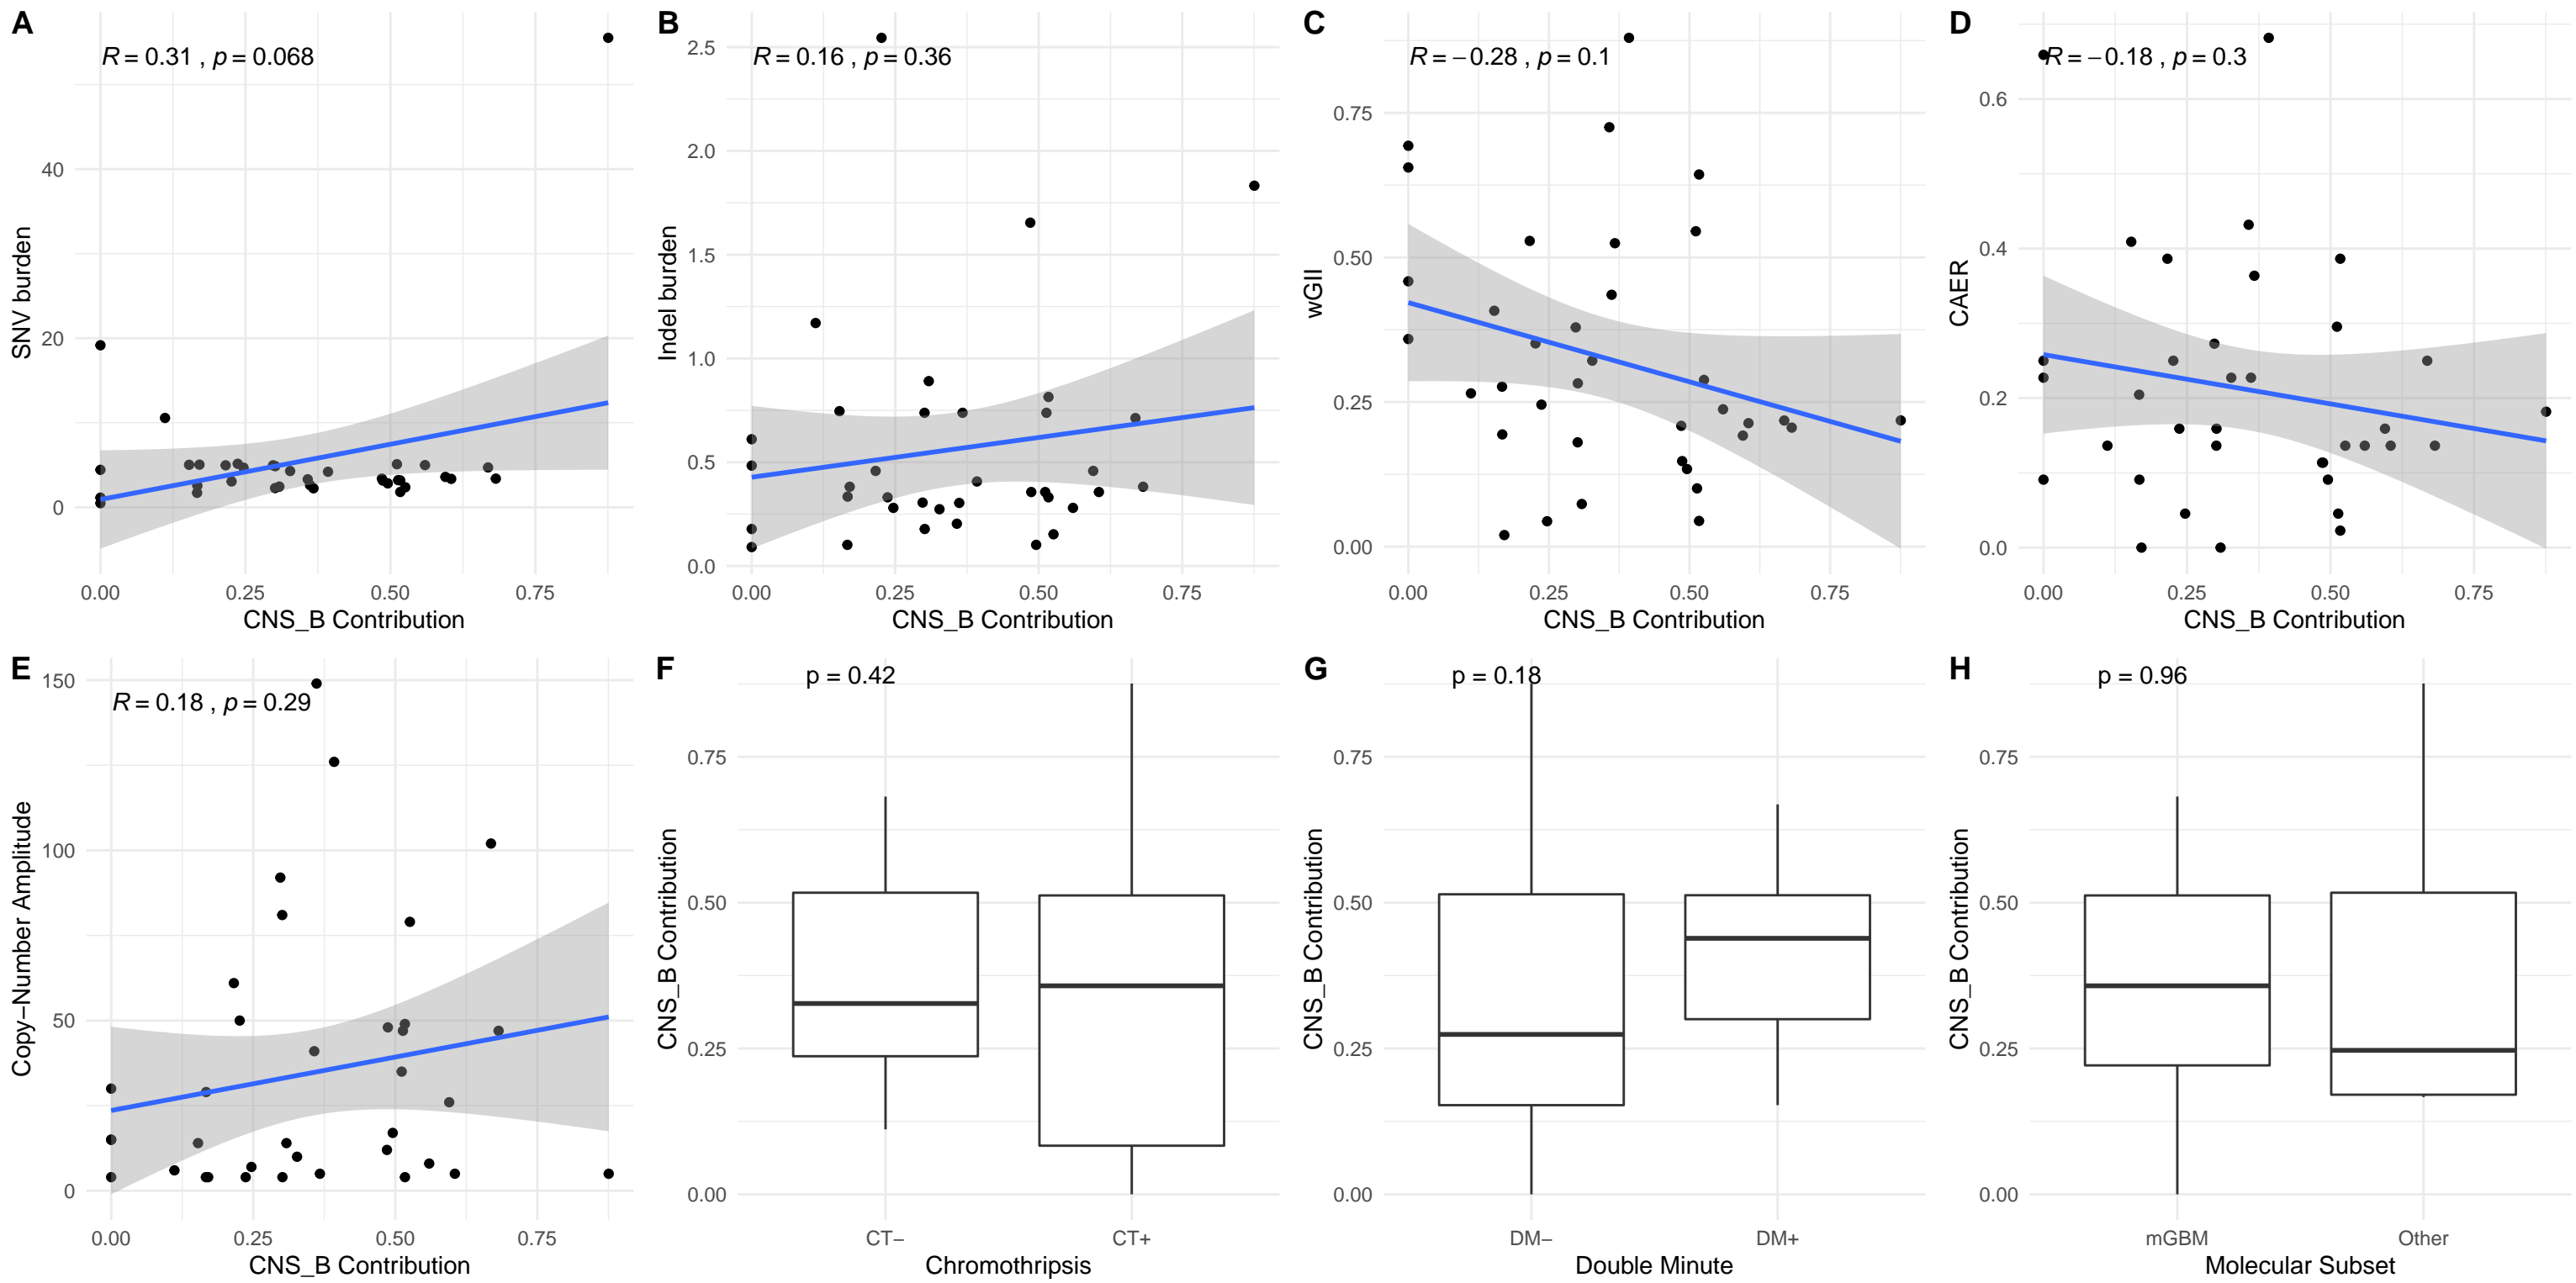

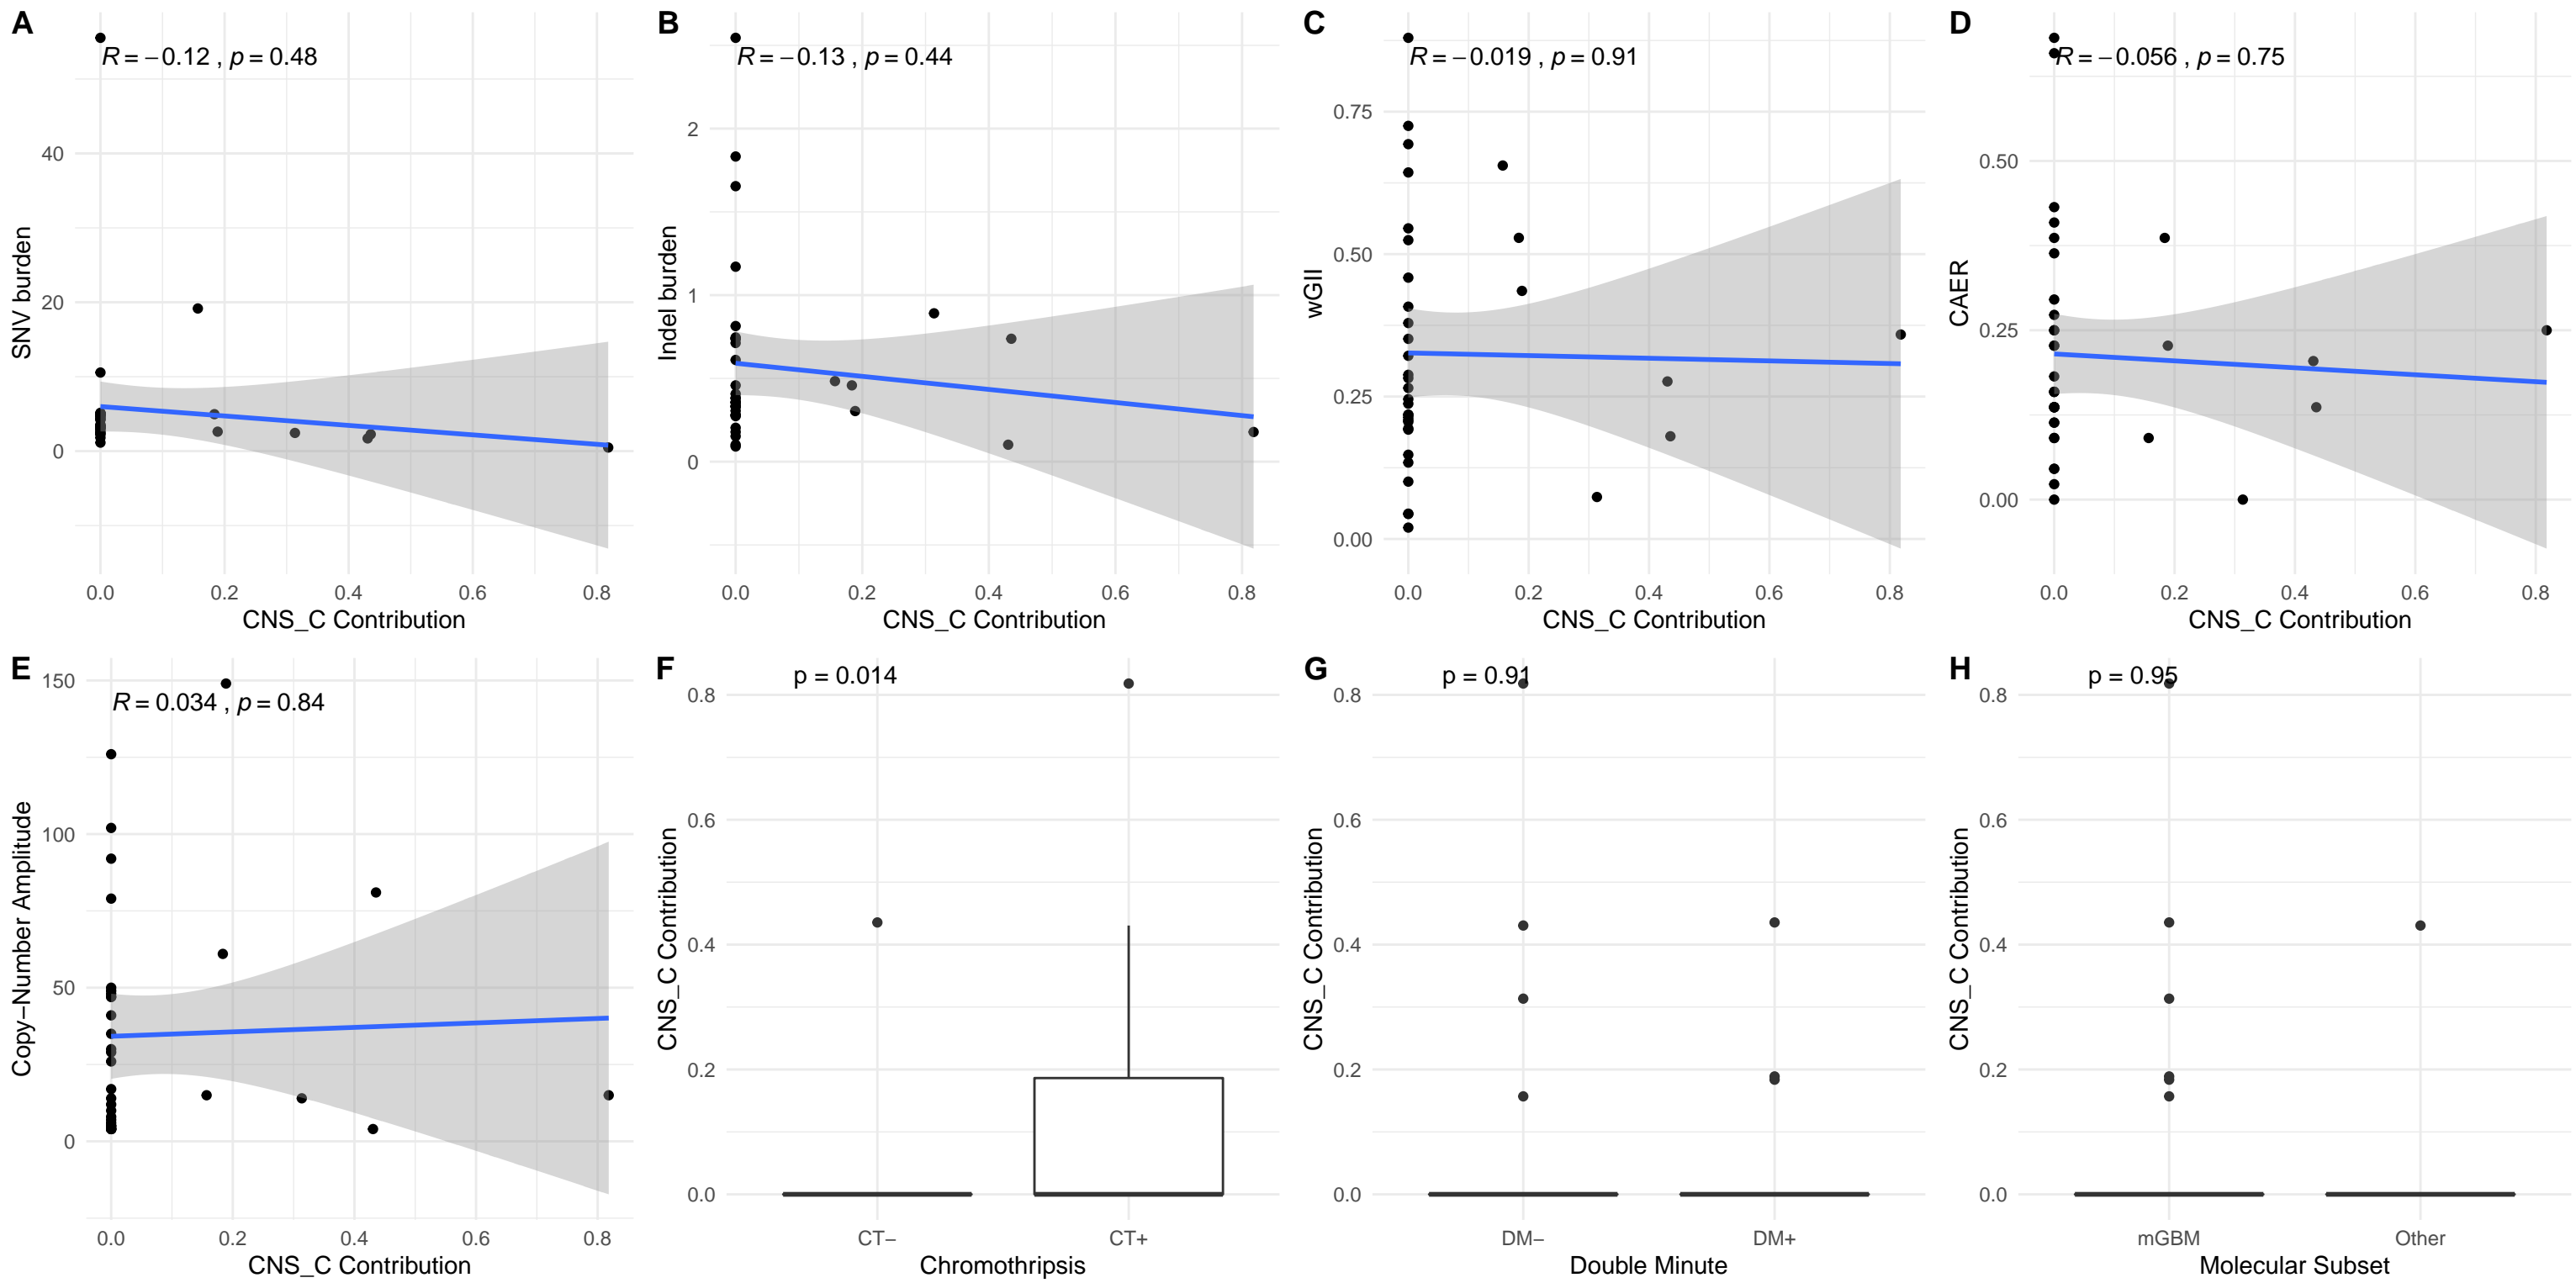

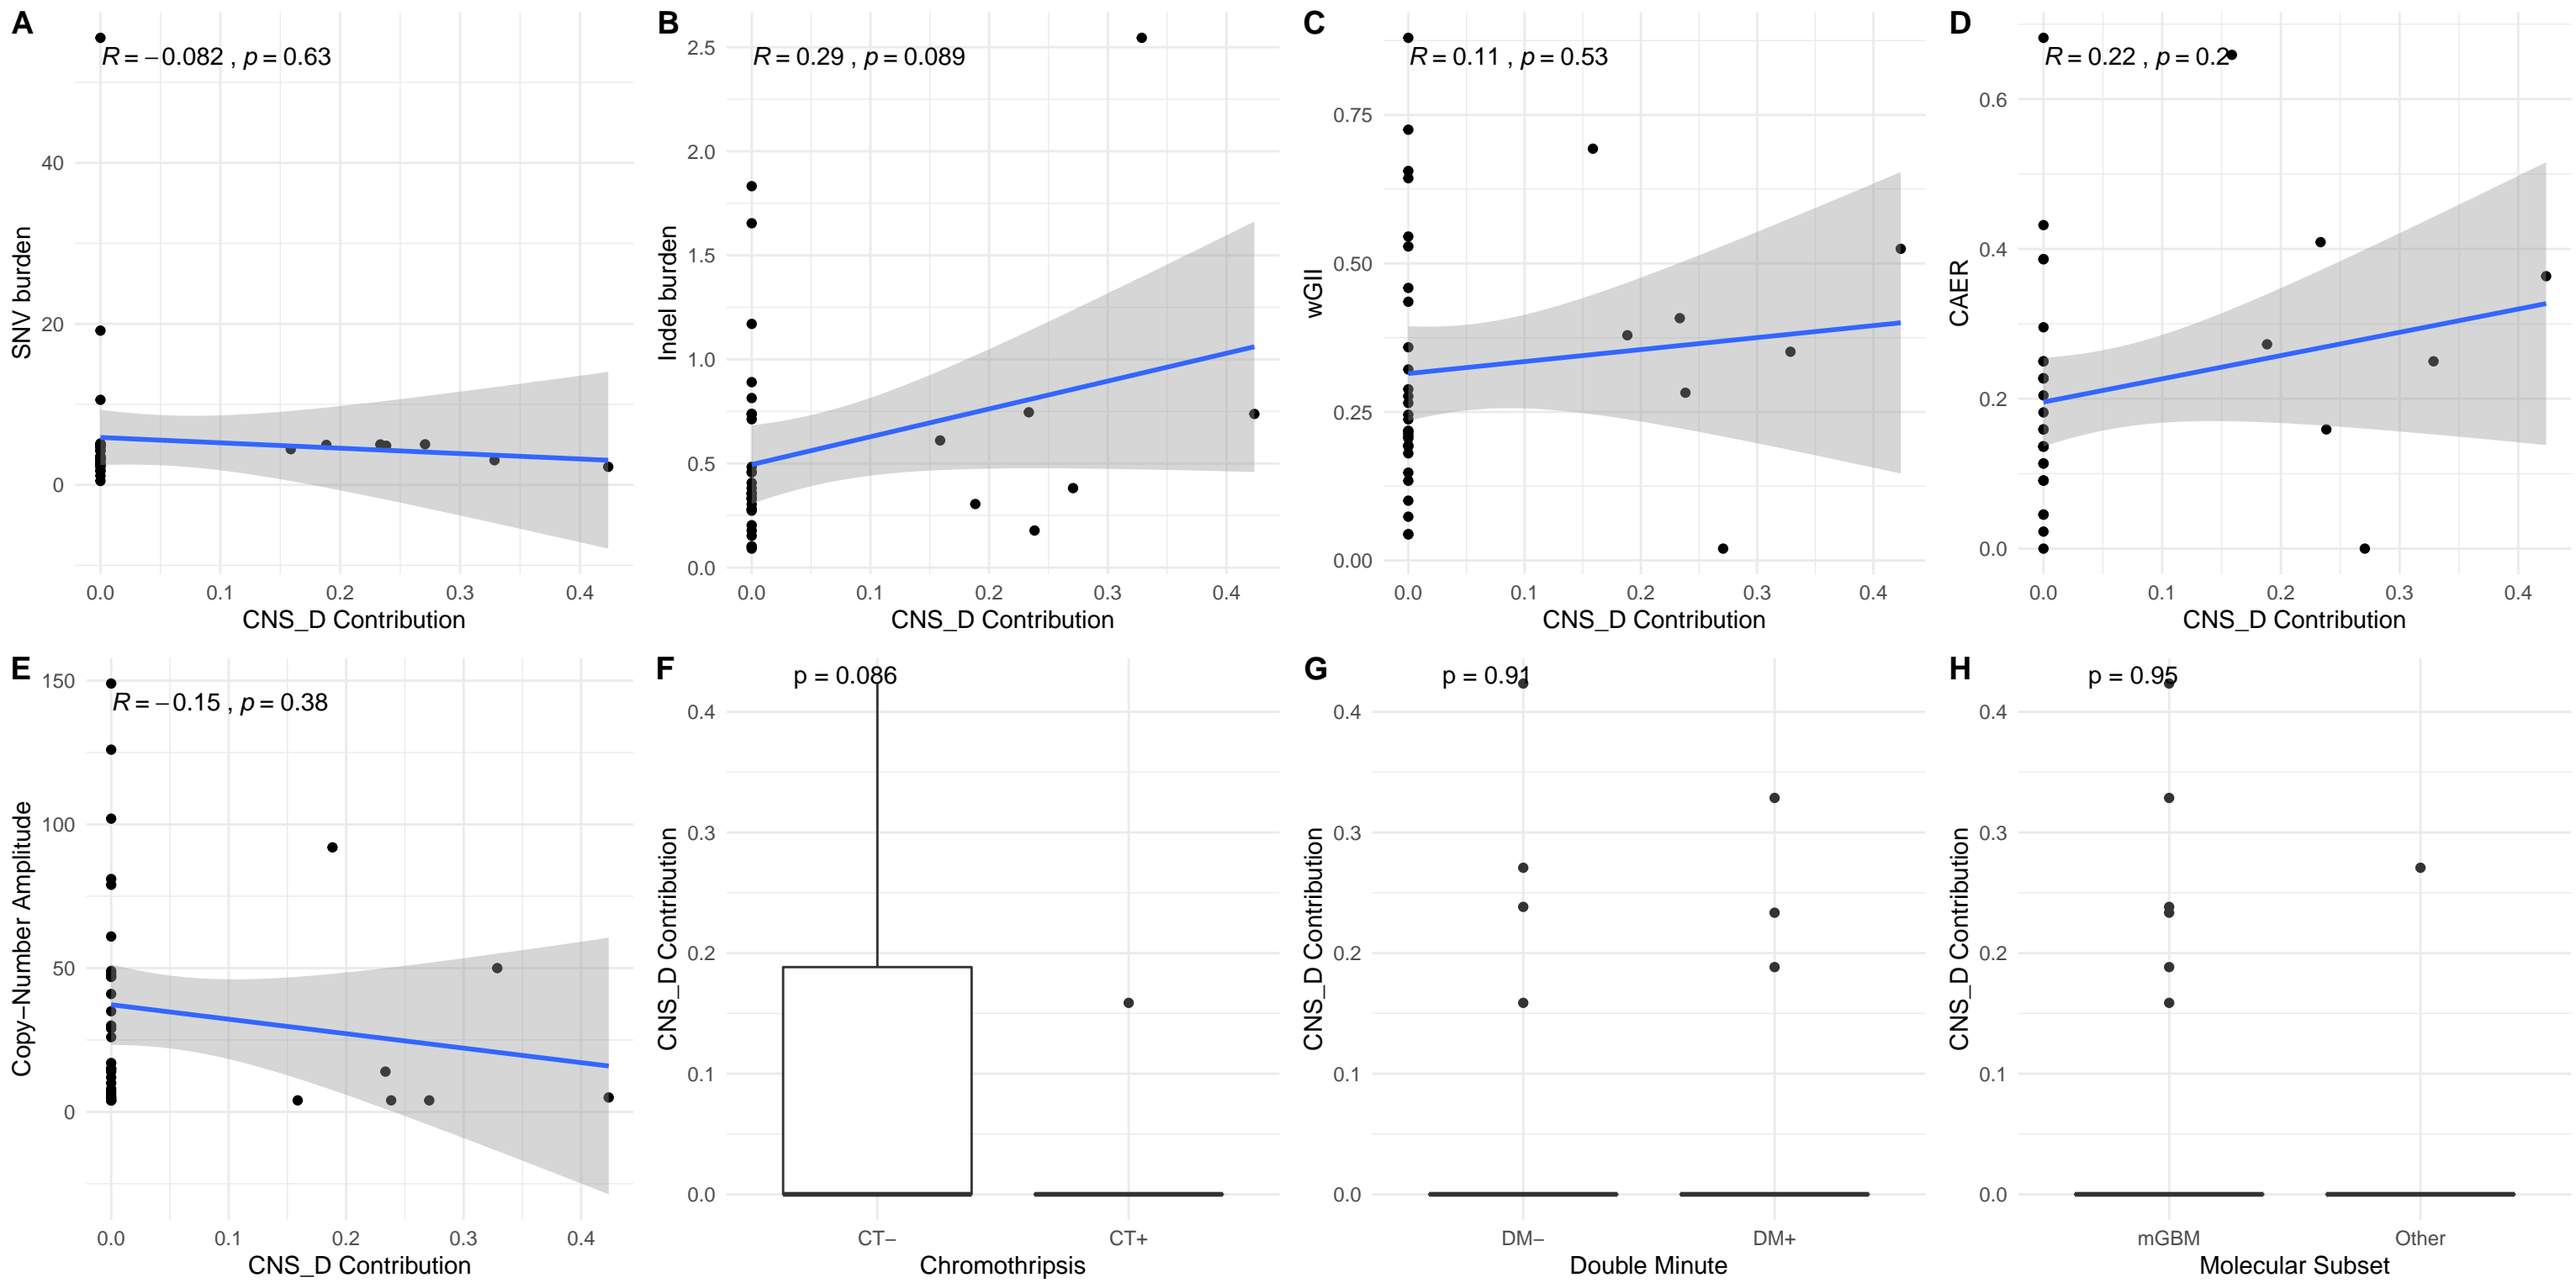

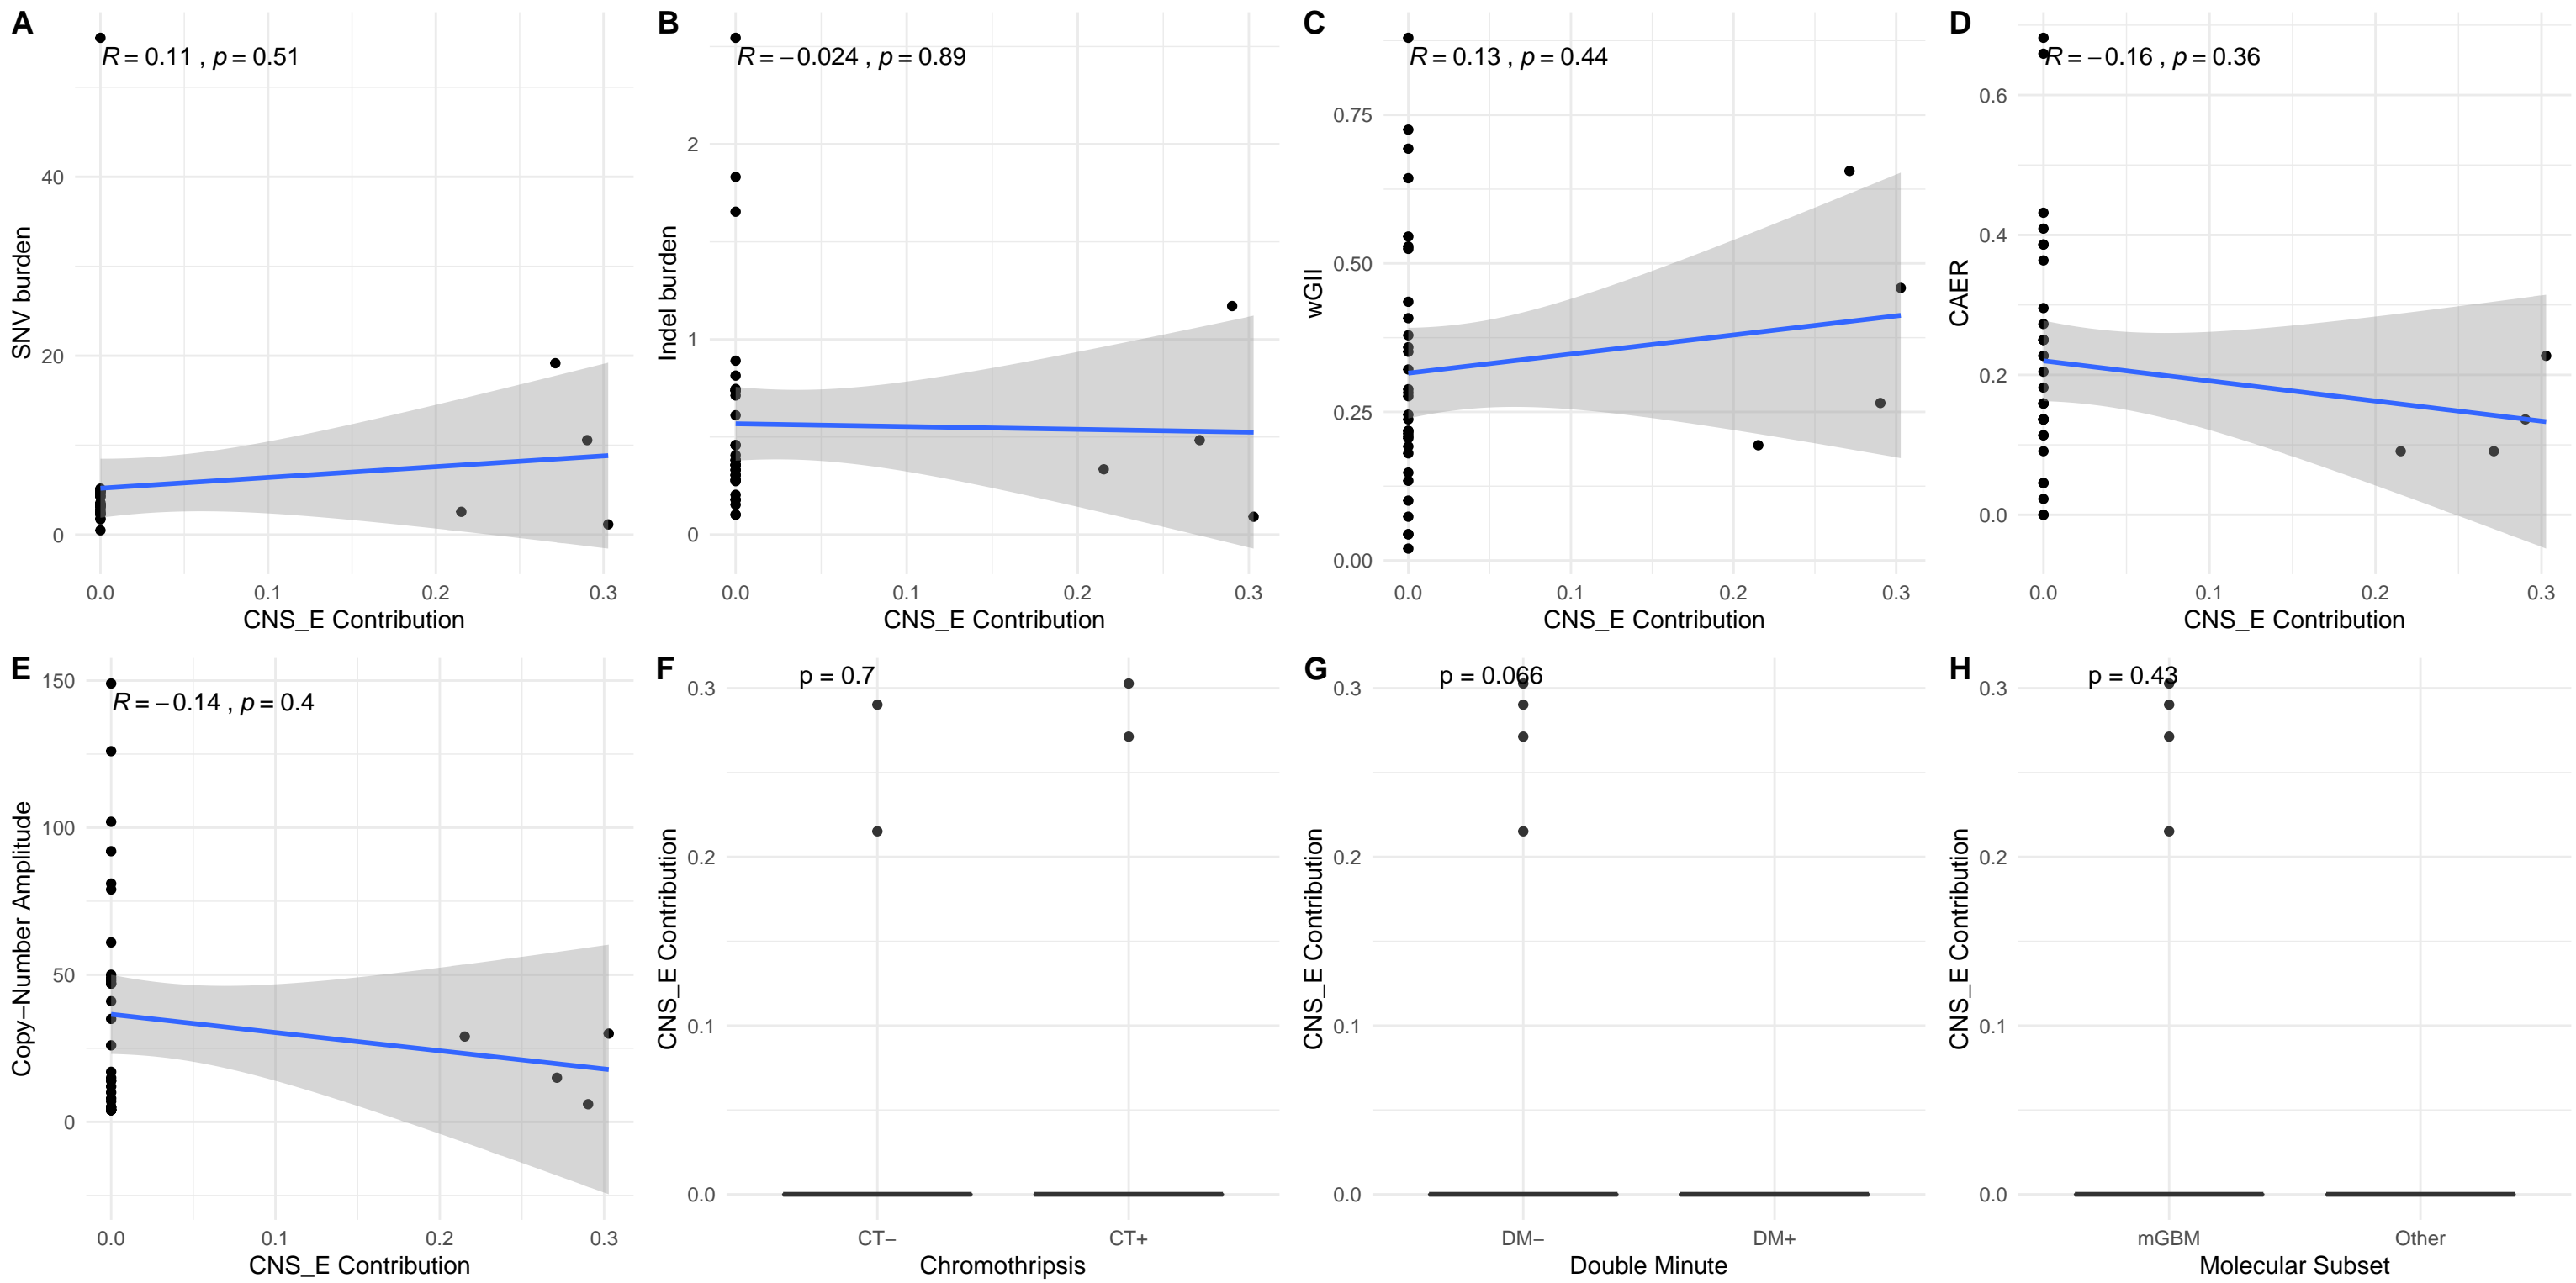

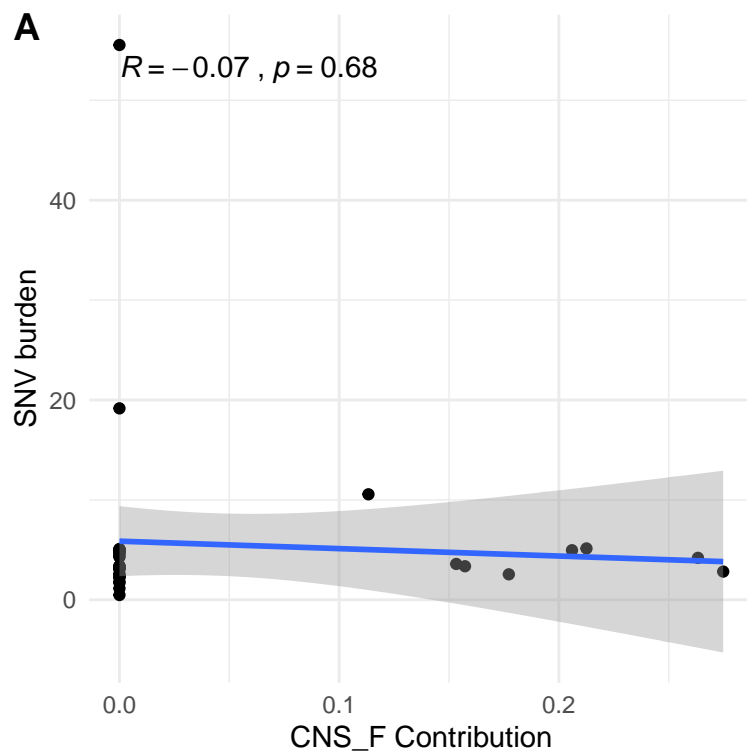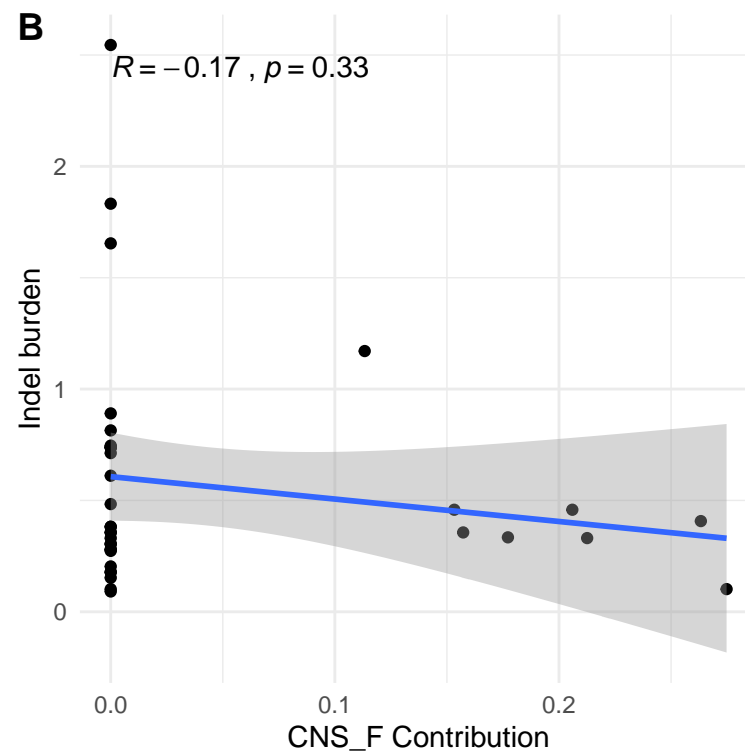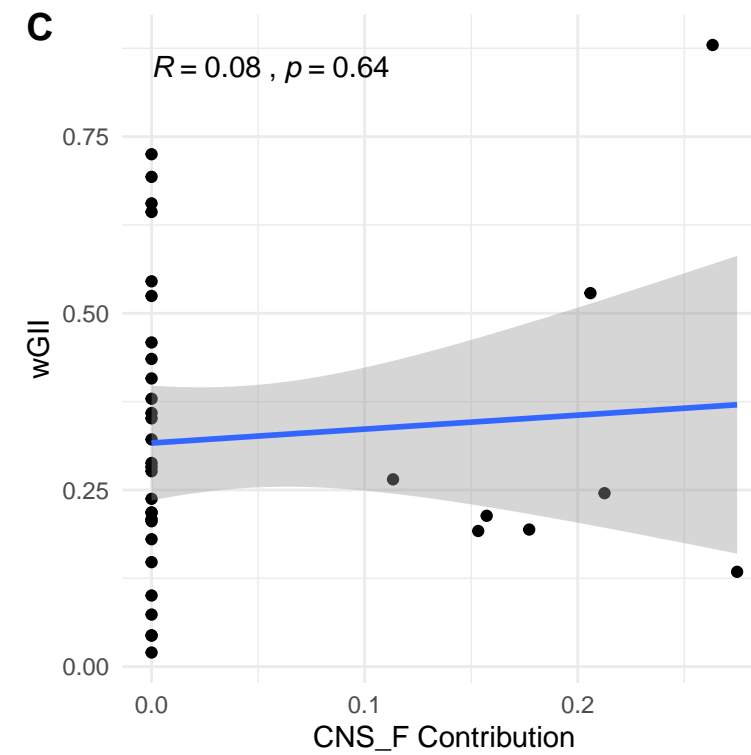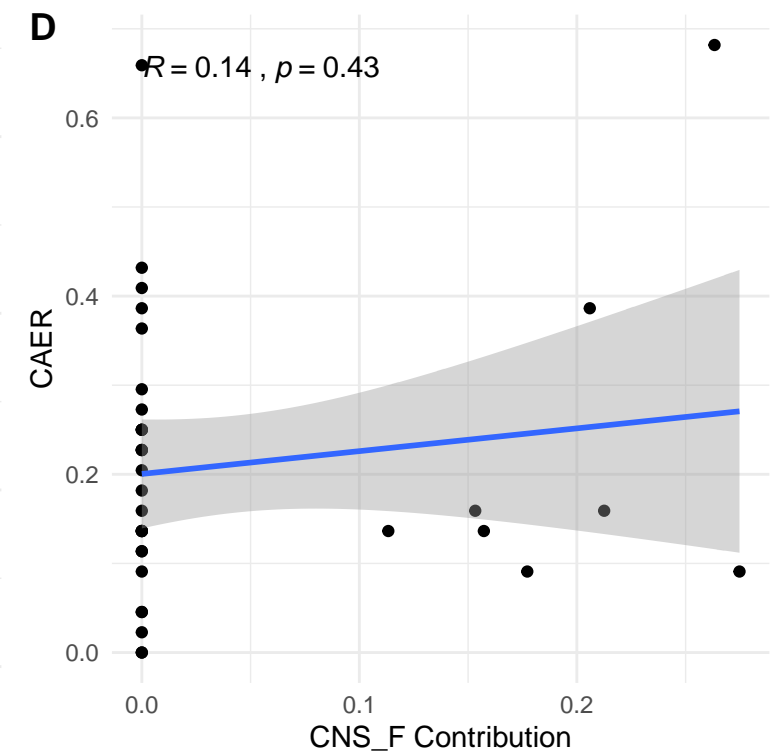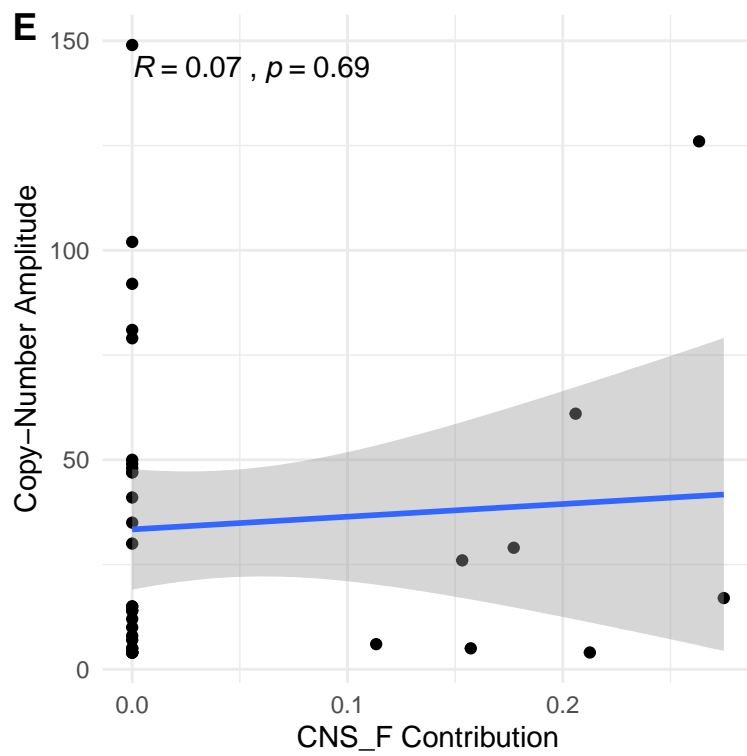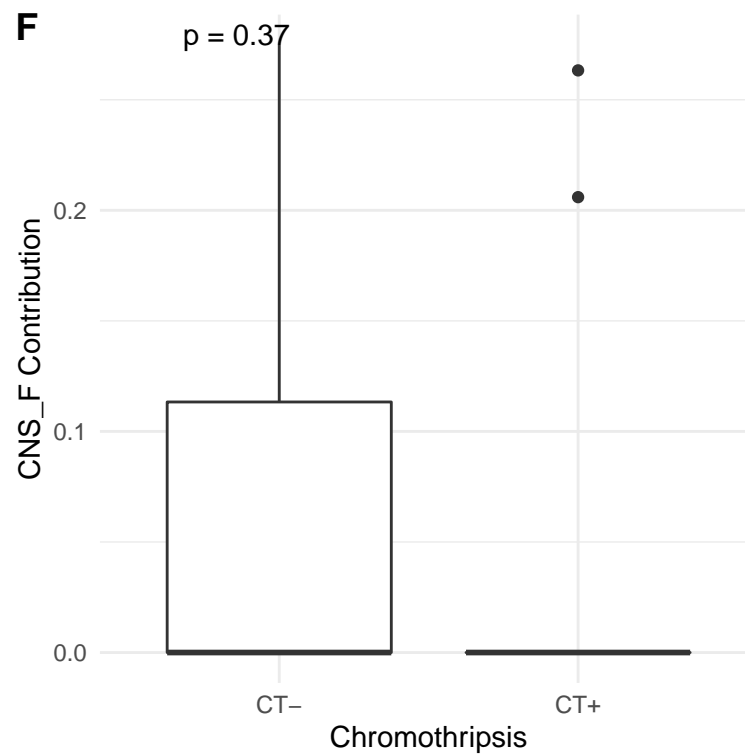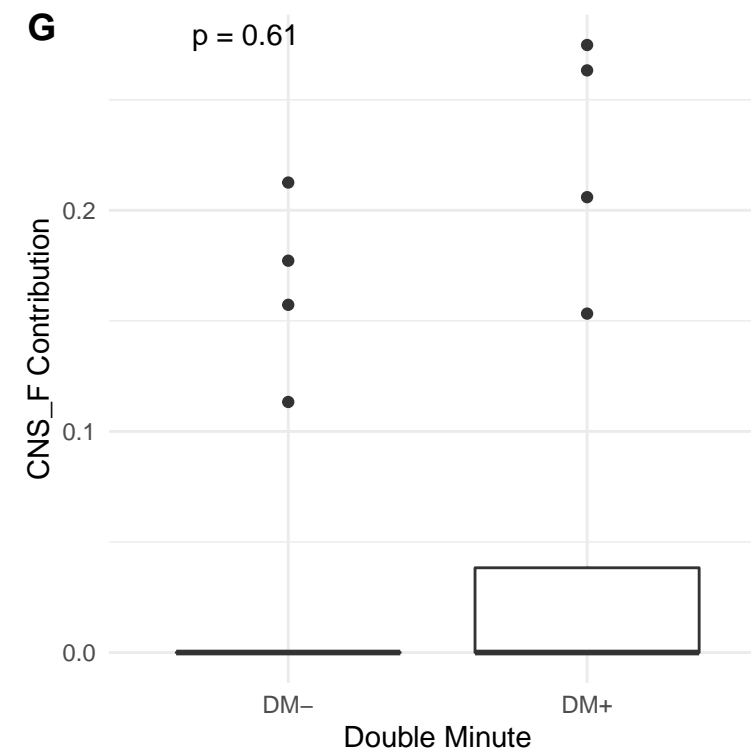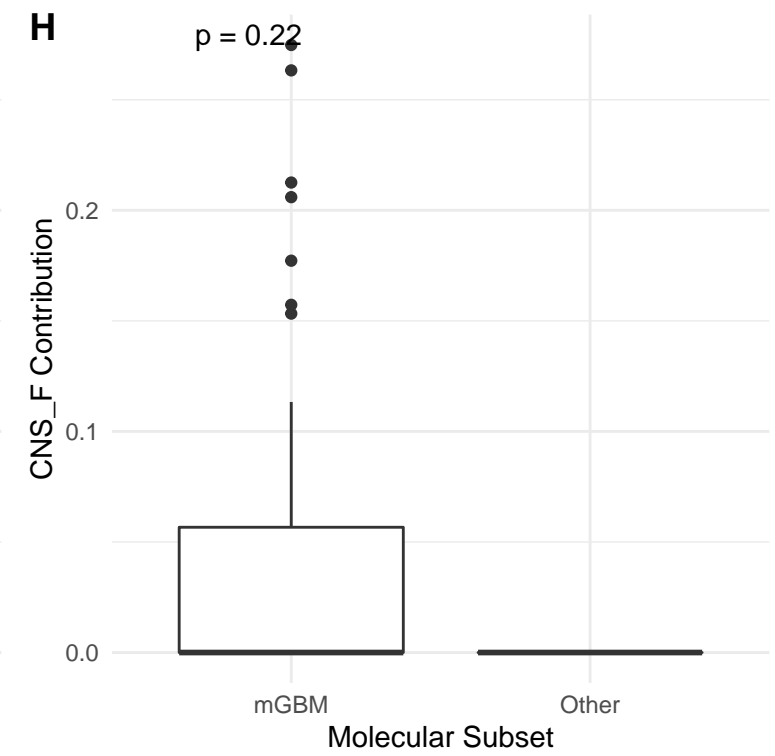

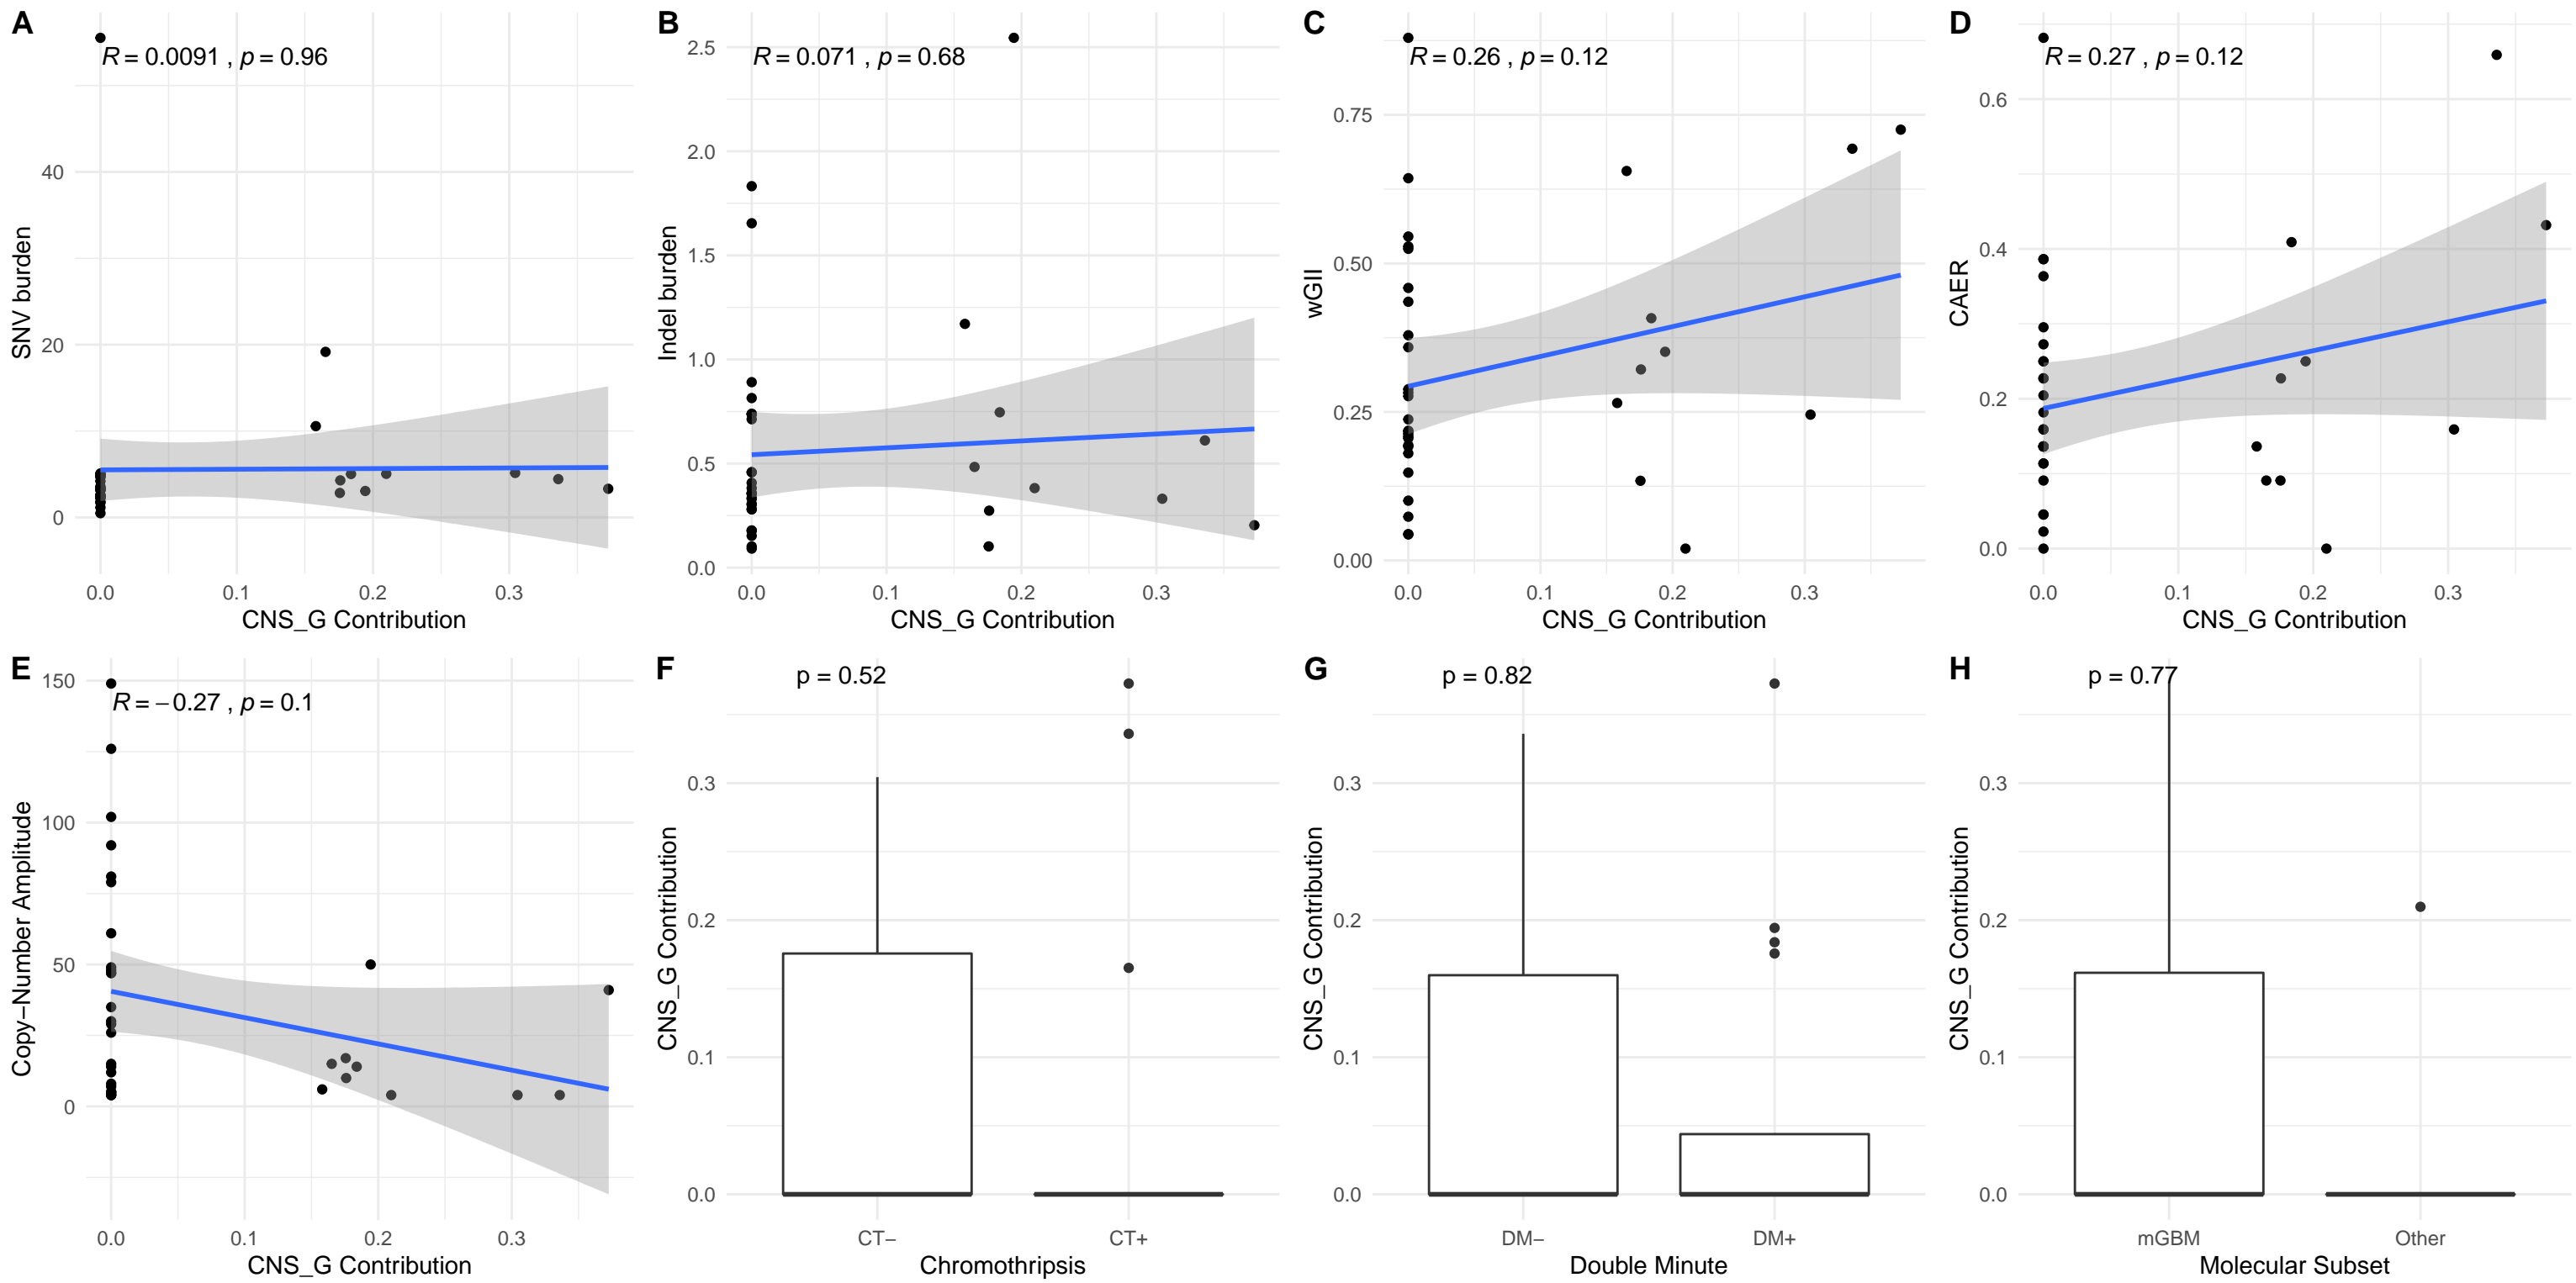

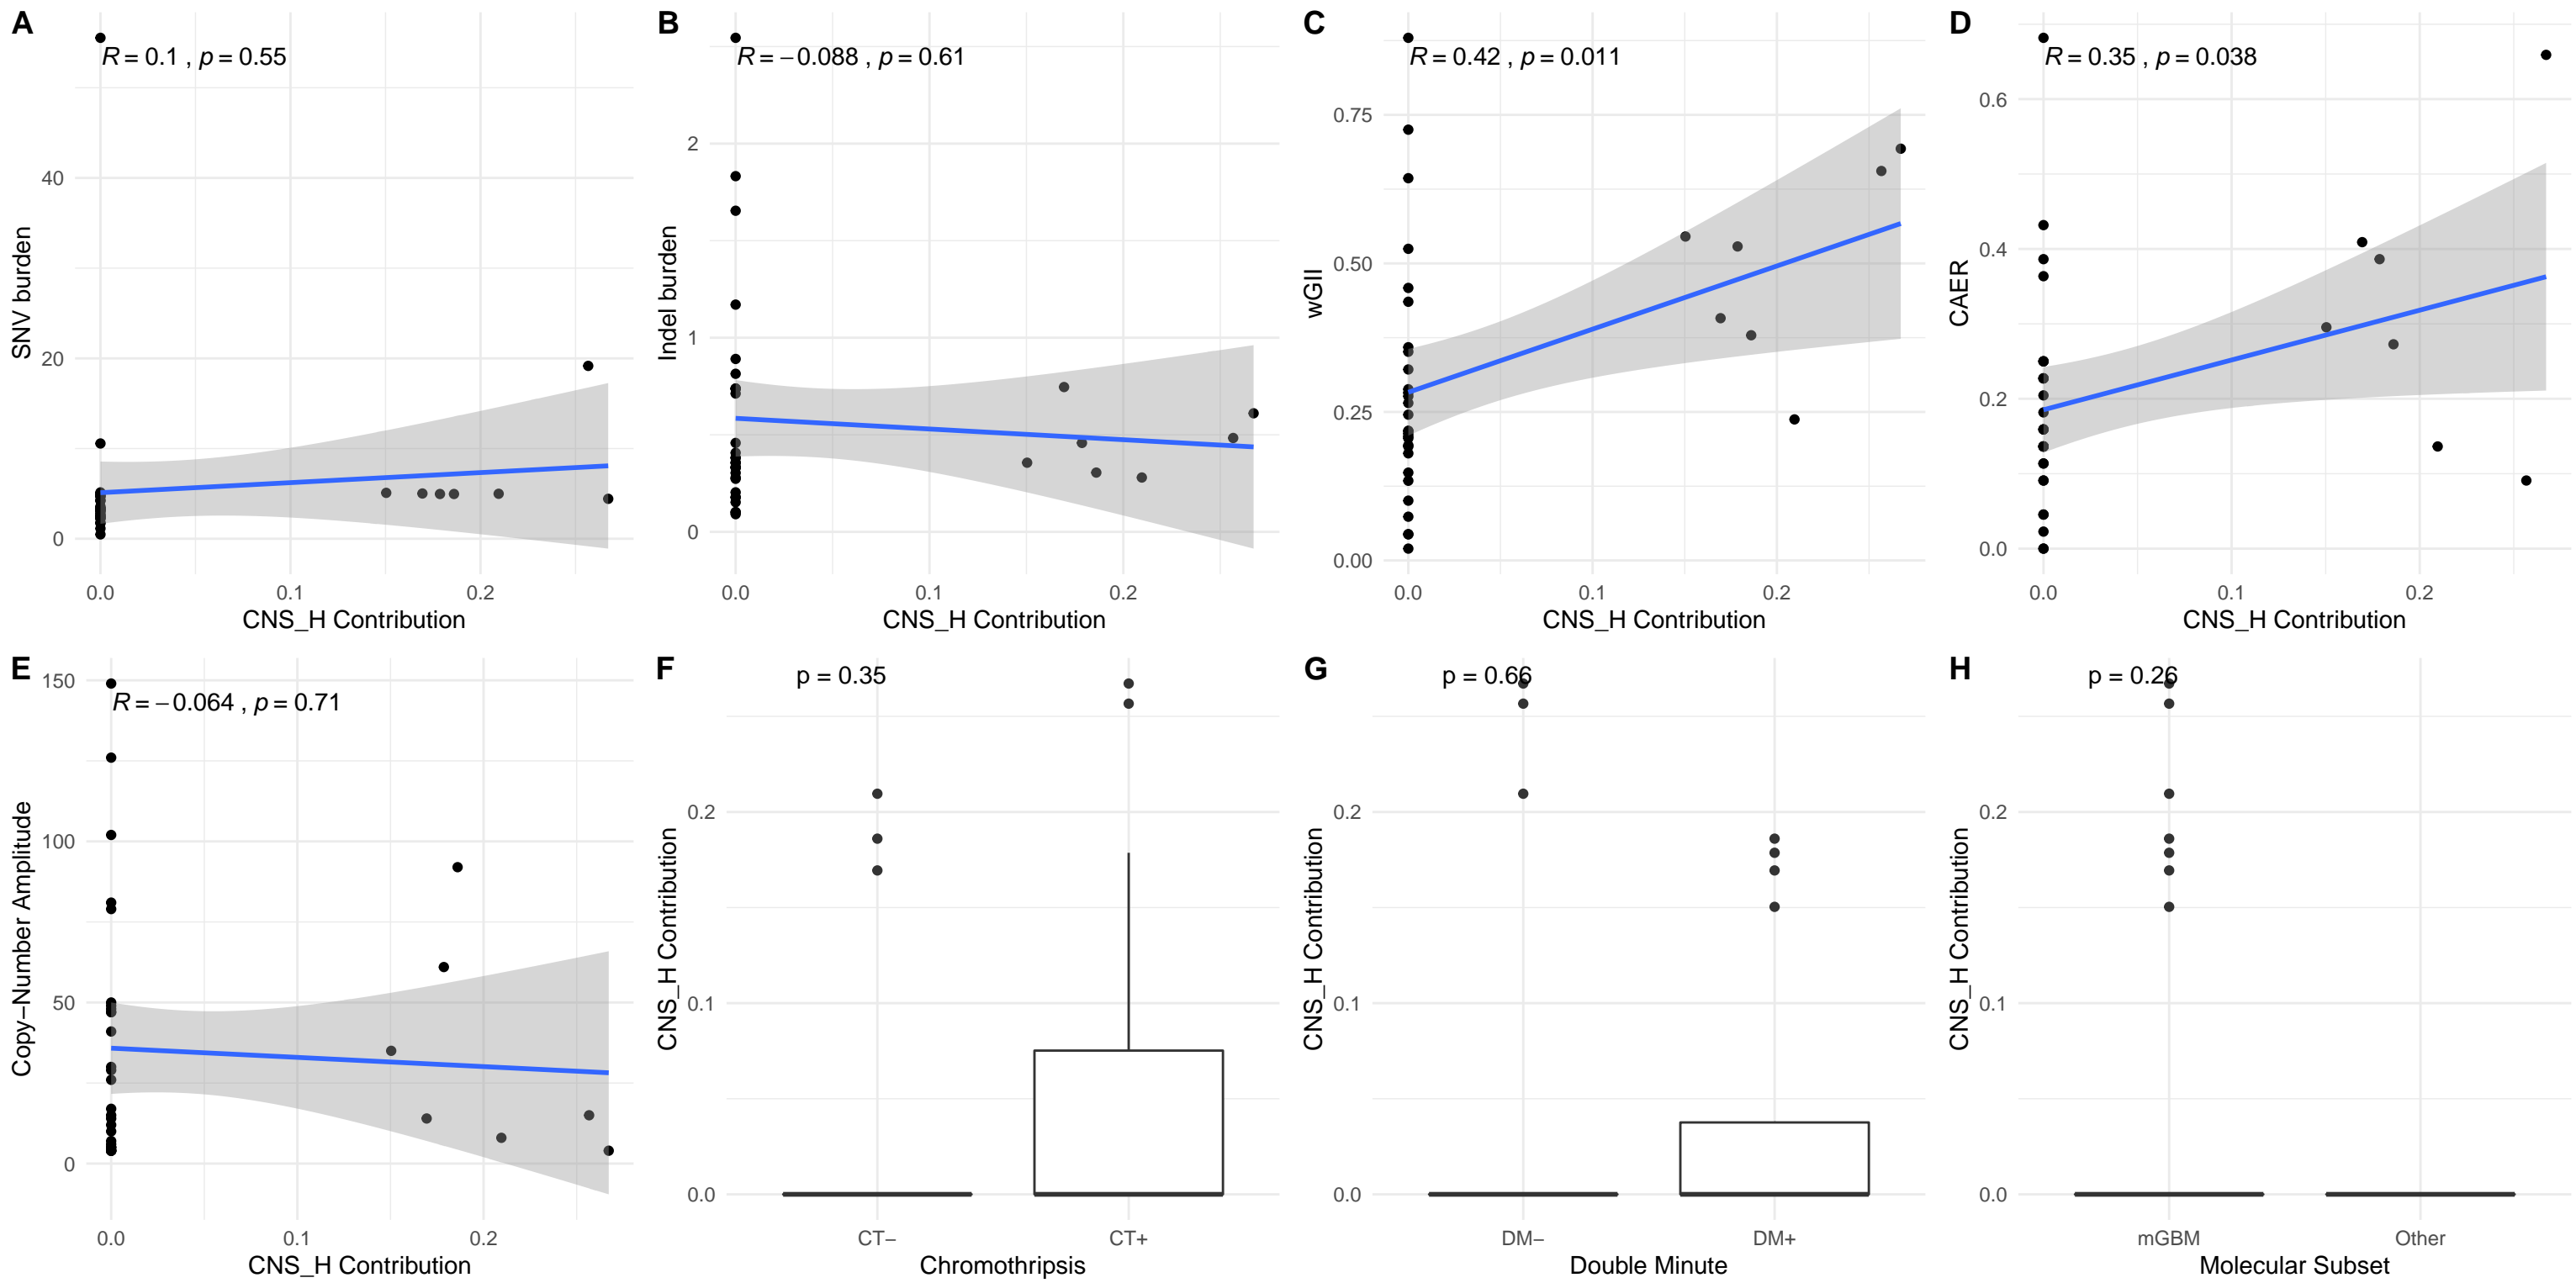

Supplement: s1 [file s1]

mGBM (n = 31)

A

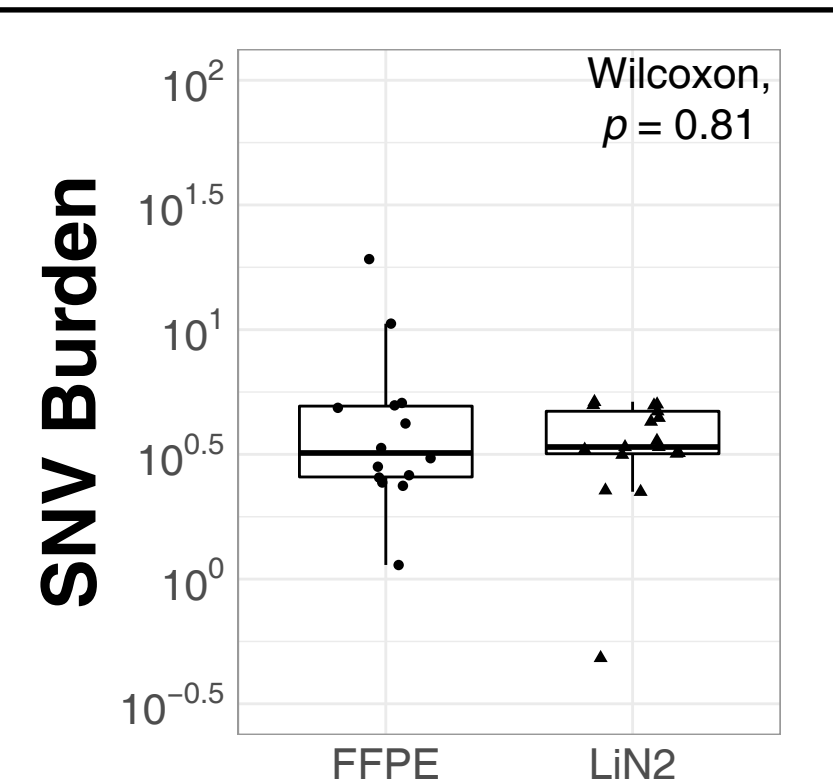

B

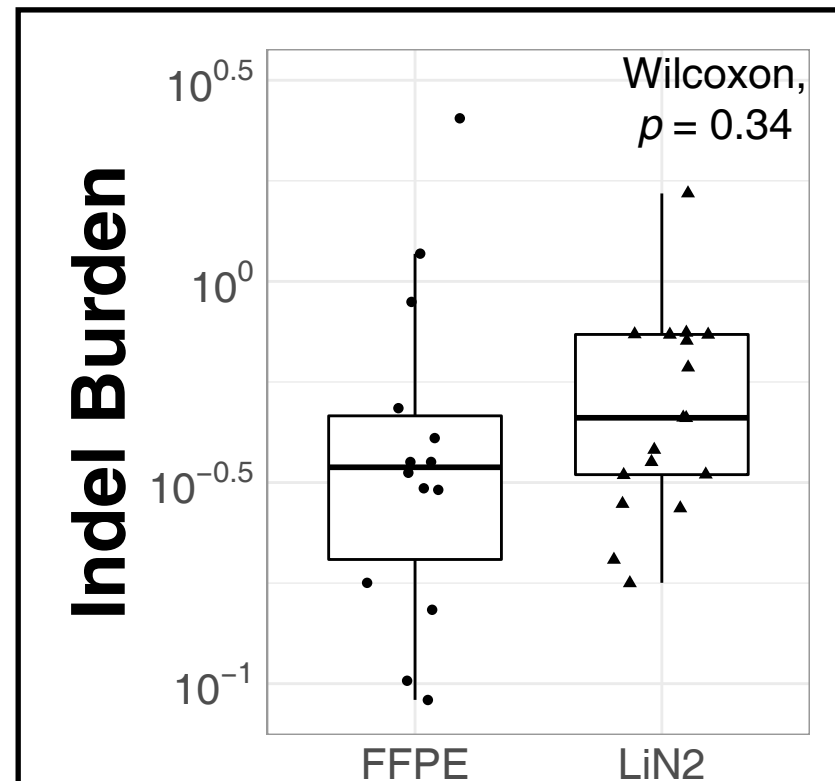

C

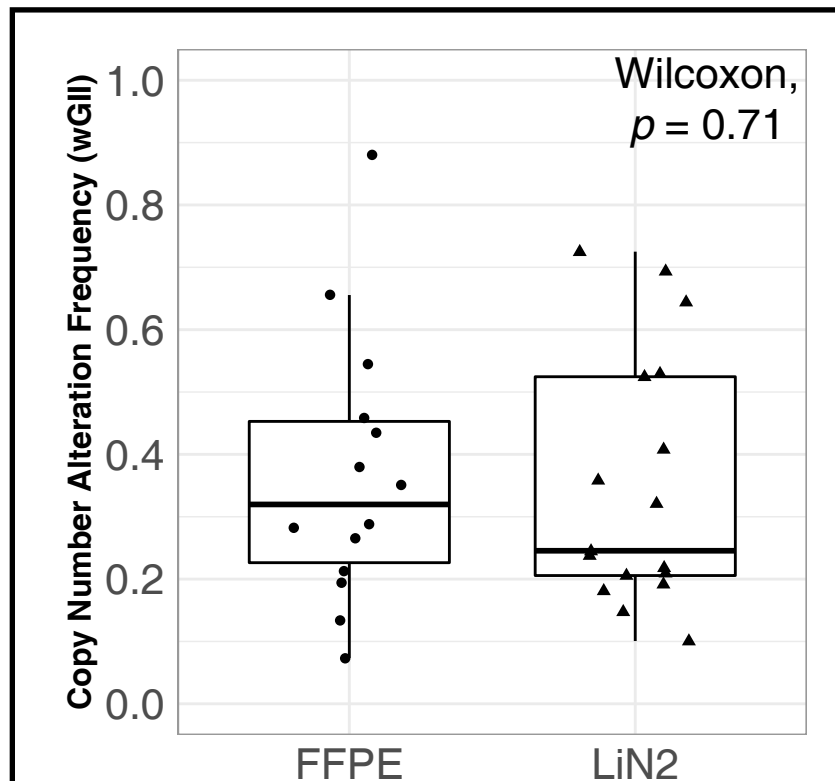

D

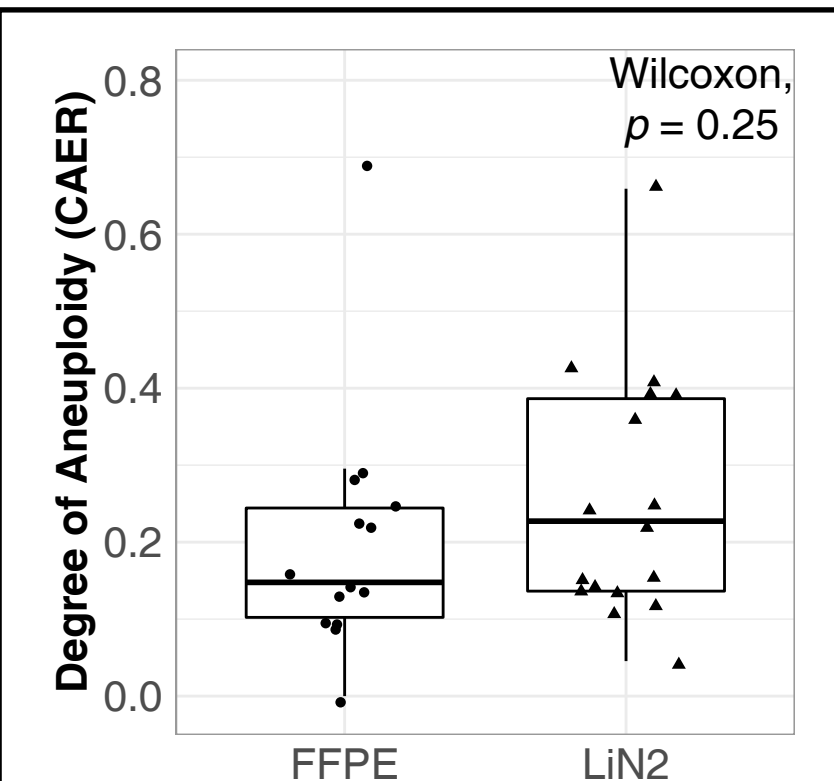

E

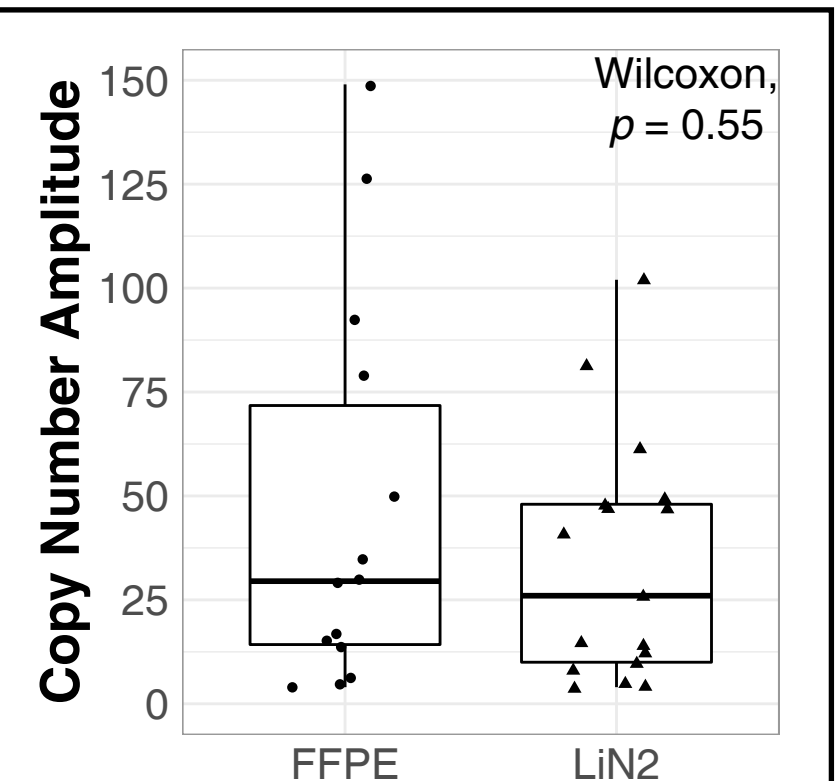

F

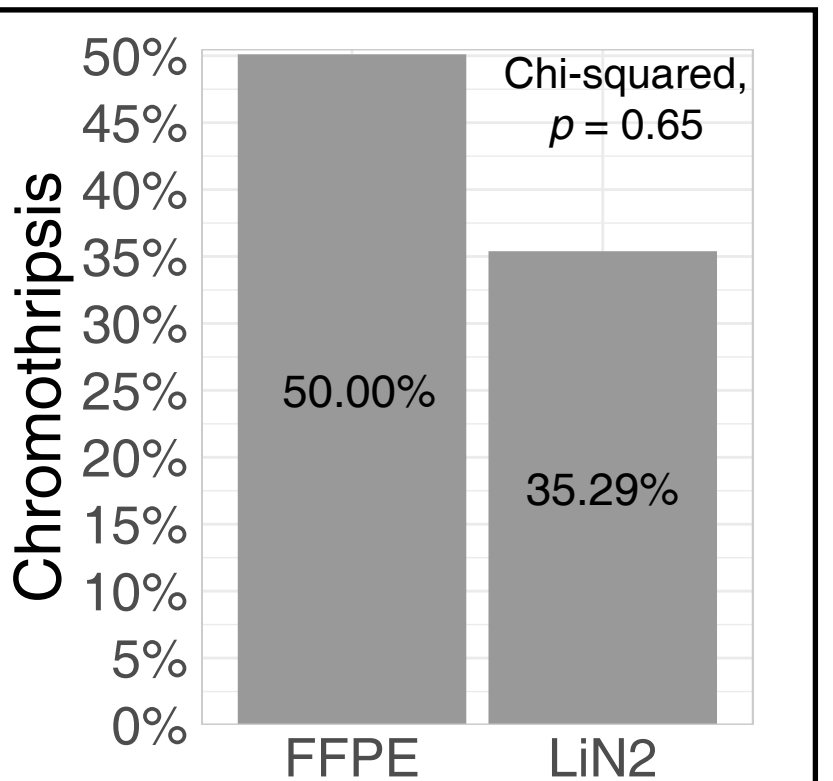

G

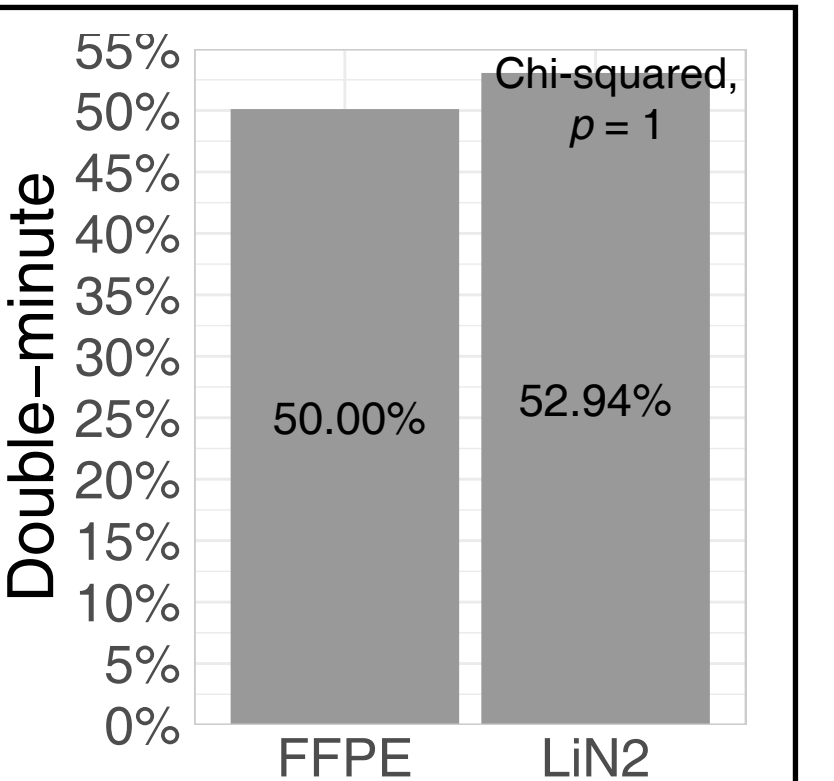

Others (n = 6)

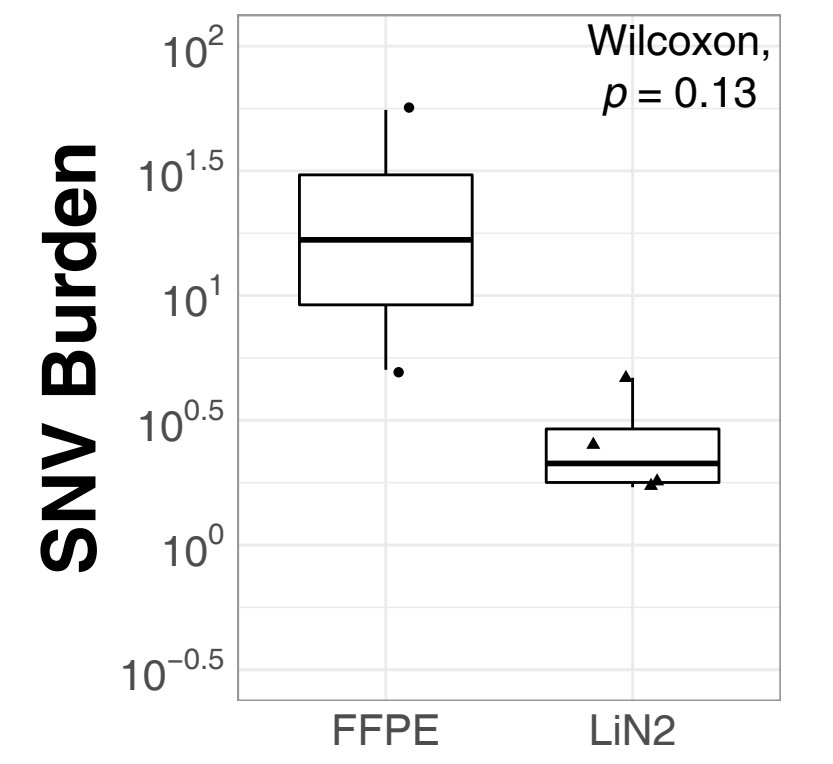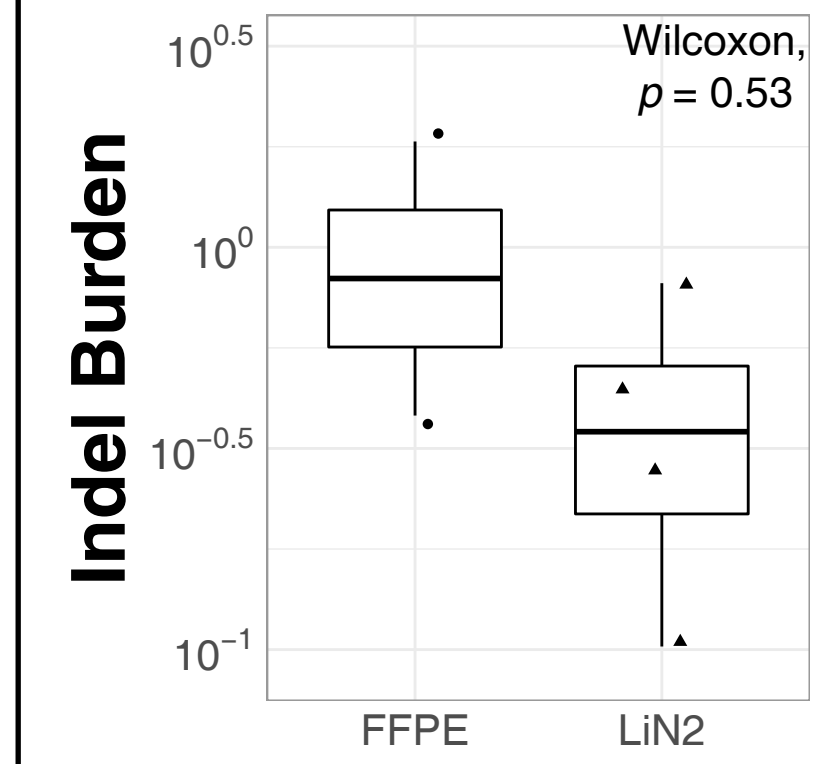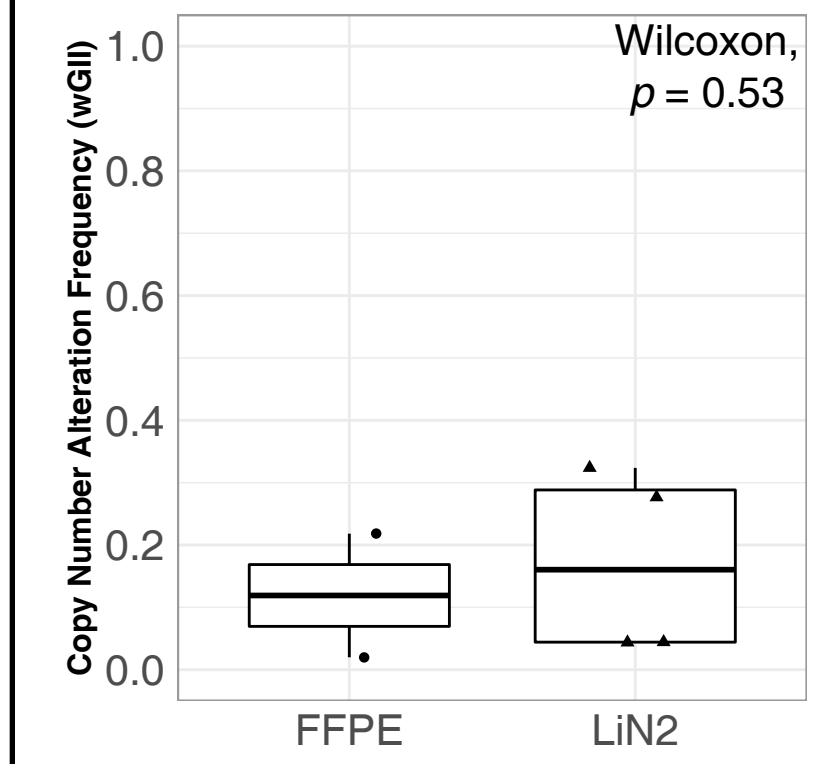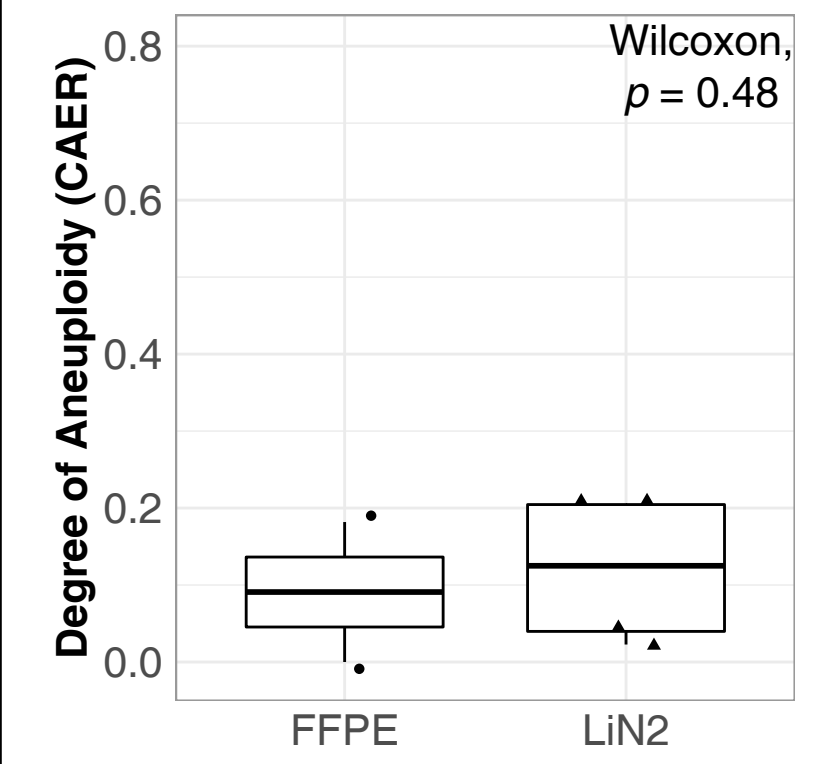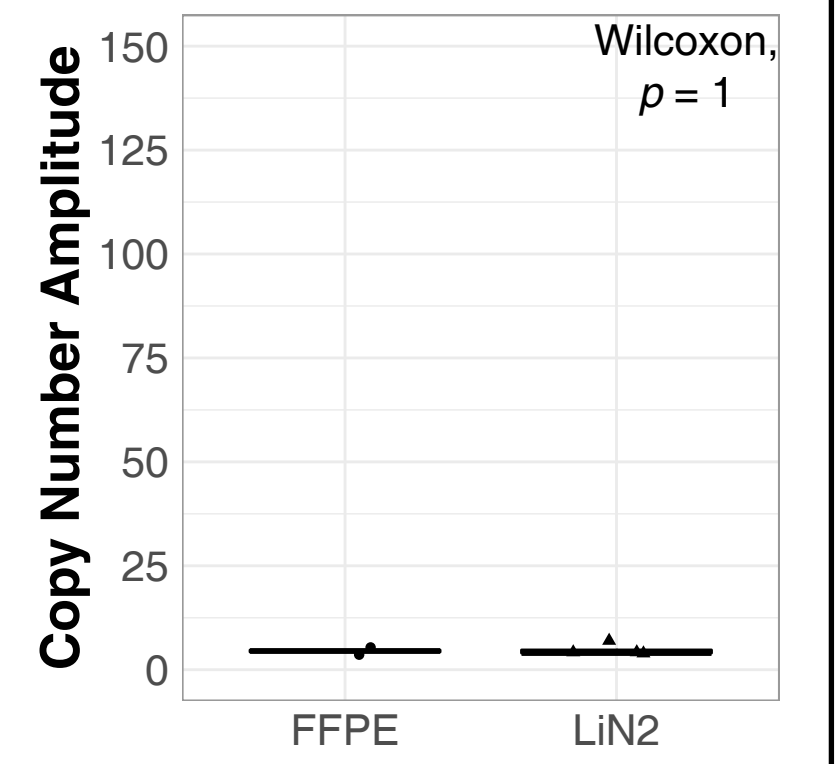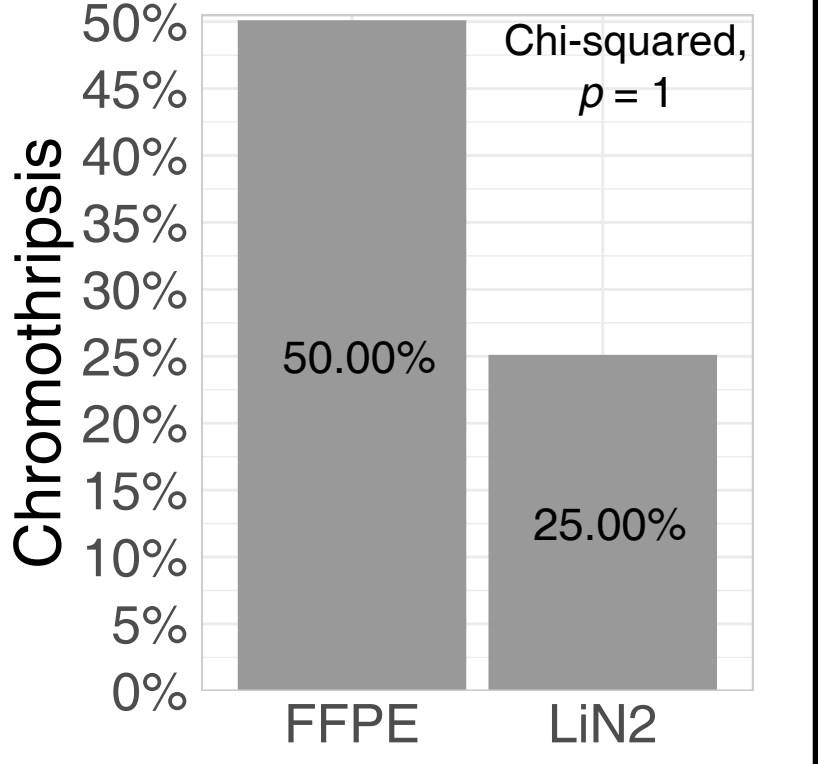

No double-minute  
in “Others” group.

Supplement: s1 [file s1]
